1 **TLR4 regulation in human fetal membranes as an explicative mechanism of a**  
2 **pathological preterm case.**

3 Corinne Belville<sup>1</sup>, Flora Ponelle-Chachuat<sup>1</sup>, Marion Rouzairé<sup>1</sup>, Christelle Gross<sup>1</sup>, Bruno  
4 Pereira<sup>2</sup>, Denis Gallot<sup>1,3</sup>, Vincent Sapin<sup>1,4</sup>, Loïc Blanchon<sup>1</sup>.

5

6 **Author affiliation:**

7 1. Team “Translational approach to epithelial injury and repair,” GReD, Université Clermont  
8 Auvergne, UMR6293 CNRS-U1103 INSERM, F-63000 Clermont-Ferrand, France.

9 2. CHU Clermont-Ferrand, Biostatistics unit (DRCI) Department, F-63000 Clermont-Ferrand,  
10 France.

11 3. CHU Clermont-Ferrand, Obstetrics and Gynecology Department, F-63000 Clermont-  
12 Ferrand, France.

13 4. CHU Clermont-Ferrand, Biochemistry and Molecular Genetic Department, F-63000  
14 Clermont-Ferrand, France.

15

16 **Corresponding author:** Dr Loïc Blanchon, UFR de Médecine et des Professions  
17 Paramédicales, Bâtiment CRBC, GReD, TSA 50400, 28 place Henri-Dunant, F63001  
18 Clermont-Ferrand Cedex 1, France, Tel: +33 4 73 17 81 74, e-mail: loic.blanchon@uca.fr

19 **Short Title:** TLR4 control upon fetal membrane rupture

20

21 **Keywords:** fetal membranes rupture / methylome / miRNA / transcriptome / TLR4

22

23 **Word count:** Abstract: 179

24

25 **ABSTRACT**

26 The integrity of human fetal membranes is crucial for harmonious fetal development throughout  
27 pregnancy. Their premature rupture is often the consequence of a physiological phenomenon  
28 previously exacerbated. Beyond all biological processes implied, inflammation is of primary  
29 importance and is qualified as “sterile” at the end of pregnancy. Complementary methylomic  
30 and transcriptomic strategies on amnion and choriodecidua explants taken from the altered  
31 (cervix zone) and intact fetal membranes at term and before labor were used in this study. By  
32 cross-analyzing genome-wide studies strengthened by *in vitro* experiments, we deciphered how  
33 the expression of Toll-like receptor 4 (TLR4), a well-known actor of pathological fetal  
34 membrane rupture, is controlled. Indeed, it is differentially regulated in the altered zone and  
35 between both layers by a dual mechanism: 1) the methylation of TLR4 and miRNA promoters  
36 and 2) targeting by miRNA (let-7a-2 and miR-125b-1) acting on the 3'-UTR of TLR4.  
37 Consequently, this study demonstrates that a fine regulation of TLR4 is required for sterile  
38 inflammation establishment at the end of pregnancy and that it may be dysregulated in the  
39 pathological premature rupture of membranes.

40

41

42

43

44

45

46

47

## 48 INTRODUCTION

49 Placenta and fetal membranes are extra-embryonic tissues originally formed by  
50 trophoblastic cell differentiation. Although these organs are transitory, their integrities  
51 throughout pregnancy are essential for harmonious *in-utero* fetal development. Protecting the  
52 fetus (considered a semi-allogeneic graft), fetal membranes are composed of amnion and  
53 chorion, creating a 0.5 mm-thick layer surrounding the amniotic cavity. They are important for  
54 the protection of the fetus against infections ascending the genital tract and for the initiation of  
55 programmed term rupture (Joyce *et al*, 2009; Kendal-Wright, 2007). The site of rupture is a  
56 particular and unique zone of altered morphology (ZAM) situated around the cervix (McLaren  
57 *et al*, 1999; McParland *et al*, 2003), which along with a zone of intact morphology (ZIM)  
58 presents specific histological characteristics involving a substantial reduction of both layer  
59 thickness and cellular apoptosis (El Khwad *et al*, 2006) decreased the adherence of the amnion  
60 and the choriodecidua; the appearance of a swollen, spongy layer between them (Mauri *et al*,  
61 2013) and epithelial to mesenchymal transition (EMT) (Silva *et al*, 2020). The evident global  
62 regional disorganization is principally a consequence of neutrophil and macrophage migrations  
63 (Osman *et al*, 2006) and collagen remodeling, which are essentially linked to an increased  
64 activity of matrix metalloproteinases (MMP) (McLaren *et al*, 2000). Furthermore, the release  
65 of pro-inflammatory cytokines due to innate immunity activates global inflammatory pathways,  
66 usually referred to as “sterile inflammation” (Gomez-Lopez *et al*, 2014). A sequential scenario  
67 occurs with the first chorion’s breaking, amnion invagination, and rupture (Gillaux *et al*, 2011).

68 Dysregulation of fetal membrane’s integrity or a premature activation of inflammatory  
69 pathways could lead to preterm premature rupture of membranes (PPROM). This is associated  
70 with a high mortality rate and significant morbidity in newborn survivors due to fetal  
71 prematurity and maternal complications (Goldenberg *et al*, 2008). Such pathology, affecting  
72 the amnion and chorion before 37 weeks of gestation, accounts for approximately 30% of

73 premature deliveries and 1–3 % of all births (Waters & Mercer, 2011). Deregulated genes (e.g.,  
74 MMP1, ITGA11, and THBS2; (Wang *et al*, 2008; Yoo *et al*, 2018) miRNA, (Enquobahrie *et*  
75 *al*, 2016), and long chain non-coding RNA (lncRNA) (Luo *et al*, 2013)) expressions were  
76 demonstrated to correlate with PPROM appearance by affecting different biological pathways.  
77 Several causes have been found to increase the incidence of this pathology, where  
78 microorganisms ascending and invading the intra-amniotic cavity appear to be one of the most  
79 important explanations (Konwar *et al*, 2018; Musilova *et al*, 2015; Romero *et al*, 2006a). This  
80 leads to chorioamnionitis, triggering an early and acute inflammatory response and implying  
81 the involvement of intracellular or surface-expressed pattern recognition receptors (PRRs) as  
82 innate components of the immune system, including the most frequently described toll-like  
83 receptor (TLR) family (Kawai & Akira, 2010; Newton & Dixit, 2012).

84 To better understand the physiological and pathological rupture of membranes, the  
85 molecular study of global changes in gene expression can be accomplished using high-scale  
86 technics analyses. Only 12 % of the studies concerning gestational tissues have used fetal  
87 membranes. Furthermore, only 5 % investigated healthy pregnancies, whereas a physiological  
88 case could undoubtedly serve as an image of a premature exacerbated phenomenon in a  
89 pathological case. Ninety percent were conducted on pathological pregnancies, with 31 %  
90 specifically involving PPROM (Eidem *et al*, 2015). In term delivery, several researchers have  
91 observed an acute inflammatory signature in fetal membranes under different conditions: labor  
92 versus no labor (Haddad *et al*, 2006) in the placental amnion versus the reflected amnion with  
93 labor (Han *et al*, 2008) and in the choriodecidua (Stephen *et al*, 2015). Using human primary  
94 amnion mesenchymal cells treated with IL-1 $\beta$ , an elegant model of sterile inflammation  
95 (rapidly-activated by NF- $\kappa$ B responsive genes) was found to be associated with an  
96 inflammatory cascade (Li *et al*, 2011; Lim *et al*, 2012). Thus, in the ZAM, the sterile  
97 inflammation and/or extracellular matrix (ECM) remodeling and disorganization absolutely

98 depends on global gene expression profiles in the amnion and the chorion. Surprisingly, only  
99 one unique transcriptome study focused on the ZIM or ZAM regions and amnion and chorion  
100 tissues, characterizing a specific differential expression in a spontaneous rupture at term with  
101 labor. Differences were observed in the chorion, though not in the amnion, specifically  
102 involving biological processes, such as extracellular matrix-receptor interaction and  
103 inflammation (Nhan-Chang *et al*, 2010). In addition to classical direct gene regulation by  
104 transcription factors, DNA methylation is another well-known epigenetic mechanism that can  
105 interfere with the transcriptional regulation of all RNA types (Kim *et al*, 2009). Concerning a  
106 physiological rupture, the differential methylation study regarding fetal membranes only  
107 focused on the amnion. Genome-wide methylation differed between the labor and non-labor  
108 groups at different pregnancy terms, particularly affecting the genes involved in cytokine  
109 production and gated channel activity, among others (Kim *et al*, 2013).

110         Because little is known about biochemical changes at term without labor (not influenced  
111 by mechanical stress) with regard to physiological conditions at the site of rupture (ZAM) and  
112 away from the site (ZIM), the purpose of our study was to exhaustively combine and correlate  
113 methylomic and transcriptomic analyses. We hypothesized that by cross-analyzing our genome-  
114 wide studies, we could explain the different levels of gene expression by comparing the  
115 amnion/choriodecidua and the ZIM/ZAM. After classifying genes into specific biological  
116 processes, we focused our study on inflammation. Under conditions at term without labor, we  
117 demonstrated that toll-like receptor 4 (TLR4), classically involved in the recognition of *E.coli*  
118 and triggering an inflammatory response in chorioamnionitis leading to PPRM (Medzhitov *et*  
119 *al*, 1997; Poltorak *et al*, 1998), was overexpressed in the ZAM choriodecidua compared to the  
120 ZAM amnion. Furthermore, we discovered that TLR4 regulation leads to layer and zone  
121 specificity. The latter occurred due to the hypomethylation of the TLR4 gene body in the ZAM  
122 choriodecidua, whereas its weak expression in the ZAM amnion layer was a direct consequence

123 of the action of two hypomethylated miRNAs targeting the 3-UTR of TLR4: let-7a-2 and miR-  
124 125b-1. Therefore, the physiological choriodecidual over-expression of TLR4 could be  
125 exacerbated in PPRM, leading to the enhancement of the first step of an early scenario of a  
126 fetal membrane rupture.  
127

128 **RESULTS**

129 **The methylomic analysis of fetal membranes allows for defining the gene ontology**  
130 **classification for the ZAM zone**

131         After identifying the differentially hypermethylated genes between the amnion and the  
132 choriondecidua on the whole genome between the ZIM and ZAM (Figure 1A), a biological  
133 process analysis was performed and represented by a four-way Venn diagram (Figure 1B). If  
134 the hypermethylated genes were clearly lower in the ZIM (1,746 genes) than the ZAM (9,830  
135 genes), the specific genes only found in the ZIM (hyper- or hypomethylated; total number 98  
136 [i.e., 10 + 88, illustrated by black circles]) did not exhibit any statistically significant result (p-  
137 value < 0.01 with a Bonferroni correction). In contrast, the specific genes modified in terms of  
138 methylation for the ZAM (total number 5,750 [i.e., 3,379 + 2,371, illustrated by white circles])  
139 led to the discovery of the numerous biological processes detailed in Figure 1C. Precisely, the  
140 number of characterizations of an enrichment in GO term IDs were clearly more concentrated  
141 and were thus more biologically significant in the case where a definite gene was more  
142 methylated in the amnion than in the choriondecidua ( $m_A > m_C$ ). The biological process term  
143 IDs containing the most important gene number were the G-protein coupled receptor signaling  
144 pathways (such as for defense response, detection of stimulus, or inflammatory response),  
145 which could be linked to sterile inflammation and to the onset of parturition related to fetal  
146 membrane ruptures.

147

148 **The transcriptomic analysis of fetal membranes in the ZAM zone is more relevant for**  
149 **downregulated genes in the amnion compared to the choriondecidua**

150         To supplement the results obtained from the methylome analysis, a transcriptomic study  
151 using the same samples was performed for the ZAM to compare the difference in gene

152 expression between the amnion and the choridecidua. We observed that 501 and 145 genes  
153 specific to the ZAM were respectively down- and upregulated when the expression levels were  
154 compared between the amnion and the choriodecidua (a log<sub>2</sub> fold change [FC] cut-off lower or  
155 higher than 2.8 [Figure 2, middle panel, supplementary Table S3]).

156 The processes seemed to be more relevant and specific when the genes less expressed  
157 in the amnion than in the choriodecidua (i.e., log<sub>2</sub> FC < 2.8) were considered. Indeed, genes  
158 could be grouped into two relevant GO terms: *response to external stimulus* and *female*  
159 *pregnancy* (Figure 2, top panel). In the case where genes were more expressed in the amnion  
160 than in the choriodecidua (i.e., log<sub>2</sub> FC > 2.8), the biological processes exhibited no statistically  
161 significant result (p-value < 0.01 with a Bonferroni correction). The analyses undertaken with  
162 uncorrected p-values did not provide relevant information because conventional tissue  
163 development or ossification were observed (Figure 2, bottom panel).

164

165 **Combination of transcriptomic and methylomic results in the ZAM zone demonstrate that**  
166 **genes more expressed in the choriodecidua are linked to pregnancy pathologies**

167 By cross-analyzing the results obtained from the two preceding analyses (methylome  
168 and transcriptome), a total of 26 genes were hypermethylated in the choriodecidua, and more  
169 were expressed in the amnion (supplementary Table S4). The biological process (GO term)  
170 analysis was not significant, which is likely due to the small number of studied genes and the  
171 fact that the underlying generic processes were linked only to urogenital abnormalities and not  
172 to pathological pregnancy, as confirmed by the MeSH disease terms (supplementary Table S5).

173 Conversely, 105 genes were hypermethylated in the amnion and were more expressed  
174 in the choriodecidua (Figure 3A and supplementary Table S6). They could be classified in  
175 MeSH disease terms linked directly to pregnancy pathologies, such as placenta diseases



176 (trophoblastic neoplasms, pre-eclampsia, fetal growth retardation, or placenta accreta), female  
177 urogenital diseases, and pregnancy complications (supplementary Table S7). The GO term  
178 analysis clearly identified three complementary pathways: response to external stimulus,  
179 detection of LPSs, and inflammatory response. Interestingly, fetal membranes were sensitive to  
180 an external stimulus, such as Gram-negative bacterial molecules and LPSs, in relation to the  
181 inflammatory response. Of all the genes classified in these processes, TLR4 was the only one  
182 represented in all these biological processes and therefore seems to play a central role in  
183 parturition at term. To validate our *in-silico* observations and to pave the way for describing  
184 TLR4's importance, immunofluorescence experiments were first conducted to confirm such a  
185 protein's presence in the amnion and the choriodecidua of the ZAM (Figure 3B). Moreover, we  
186 established the ability of the choriodecidua and the amnion to respond to TLR4 activation after  
187 the binding of its natural ligand (LPS) by secreting IL-6 and TNF- $\alpha$  proteins in the culture  
188 medium (Figure 3C). Considering the important role of TLR4 in sterile or pathological  
189 inflammation (chorioamnionitis), the remainder of the study focused on the characterization  
190 and regulation of TLR4 expression in fetal membranes, as ascertained by the cross-analysis of  
191 the methylomic and transcriptomic results.

192

### 193 **The tissue specificity of TLR4 regulation at the end of pregnancy in the weak ZAM is due** 194 **to hypermethylation in the amnion**

195 Focusing on the TLR4 genomic zone, five cytosines distributed on the promoter, body,  
196 and UTR were studied using a methylomic array. The statistical study of the cytosine  
197 methylation  $\beta$ -values of the nine genomic DNA samples demonstrated that four of five were  
198 hypermethylated in the amnion compared to the choriodecidua (Figure 4A). These results were  
199 confirmed by the bisulphite treatment and enzymatic digestion (taking advantage of the Taq I

200 restriction site present only in this CpG zone) of the amnion and choriodecidua samples with a  
201 focus on only one cytosine: cg 05429895 (Figure 4B). Furthermore, of the nine RNA samples,  
202 the link between methylation and expression revealed by the methylomic and transcriptomic  
203 arrays was confirmed by qRT-PCR (Figure 4C) and Western blot (Figure 4D) analyses,  
204 showing a higher expression of TLR4 in the choriodecidua than in the amnion.

205

### 206 **The tissue specificity of TLR4 regulation could be due to miRNA action**

207 Because gene expression can be also regulated post-transcriptionally by the action of  
208 mi-RNA, it would be interesting to perform an *in-silico* analysis of differentially methylated  
209 miRNA (linked to TLR4) between the amnion and the choriodecidua. The results showed that  
210 two of them (let-7a-2 and miR-125b-1) could target the 3'UTR region of TLR4 mRNA (Figure  
211 5A). Focusing on these two, all the cytosines studied on the methylomic chip were situated in  
212 the 5' upstream sequence of miRNA. Four of six were statistically significant for over-  
213 methylation in the choriodecidua compared to the amnion for miR-125b-1 and for the unique  
214 one in, let-7a-2 (Figure 5B up and bottom panel). Using the same samples that were previously  
215 used for the quantification of mRNA TLR4, the expression of each pri-miRNA by the qRT-  
216 PCR was checked. As expected, an overexpression of pri-miR-125b-1 was observed in the  
217 amnion compared to the choriodecidua. A weak basal expression level below the detection limit  
218 of the qPCR assay for pri-let-7a-2 did not allow for obtaining results that could reasonably be  
219 analyzed (Figure 5C).

220

### 221 **let-7a-2 and miR-125b-1 target the 3'-UTR-TLR4**

222 We first established that in the human cell line HEK293 (classically used in a gene  
223 reporter assay for testing miRNA targets), both miRNAs could decrease the amount of

224 luciferase by targeting the 3'-UTR region of TLR4 mRNA (Figure 6A). To choose a better  
225 cellular model to test this miRNA action linked with the fetal membrane environment, the  
226 relative amount of TLR4 mRNA was determined in various human amniotic cells. Figure 6B  
227 demonstrates that AV3 (one of the three tested amniocyte cell lines, compared to FL and WISH)  
228 was the most efficient, and it was therefore used for the following experiments. For *in vitro* or  
229 physiological models, AV3 and primary amniotic epithelial cells were respectively used to  
230 confirm that both miRNAs clearly targeted TLR4 mRNA or protein accumulation (Figure 6C  
231 and 6D). For the AV3 cell line, a significant decrease of the mRNA amount was observed from  
232 12 h after the transfection of let-7a-2 and miR-125b-1 or the co-transfection of let-7a-2+ miR-  
233 125b-1. This effect persisted only for let-7a-2 at 24 h, confirming the quick action of this  
234 cellular system. Furthermore, after 24 h of transfection, a decrease in the TLR4 protein amount  
235 was significantly demonstrated for let-7a-2 and after 48 h for miR-125b-1 or both transfections  
236 of let-7a-2 + miR-125b-1 (whereas a tendency was observed for let-7a-2 alone after 48 h). The  
237 use of primary cells confirmed this physiological action with a decrease in the TLR4 mRNA  
238 amount at 48 h after the transfection of miR-125b-1 and co-transfection of let-7a-2 + miR-125b-  
239 1 and after 72 h for the TLR4 protein for the three conditions.

240

241 **DISCUSSION**

242 Worldwide, preterm birth is a serious medical problem, particularly regarding the long-  
243 term consequences throughout the entire life of premature infants. PPRM represents one-third  
244 of pregnancies that end prematurely and is found to be principally dependent on an early scale  
245 and the kinetic activation of inflammation, signaling a cascade in gestational tissues.

246 Because the inflammatory mechanisms of preterm and term birth are broadly similar,  
247 understanding how human fetal membranes are prepared for their physiological rupture is  
248 essential. Studies have been partially documented and establish that a weak zone (ZAM)  
249 situated in the cervix zone emerged at the end of the nine month of the gestation period  
250 (McLaren *et al*, 1999) as a direct consequence of global layer disorganization and weakening.  
251 All these phenomena are key determinants of a rupture and could be directly linked to a  
252 common denominator: the regulation and modification of gene expression levels (Romero *et*  
253 *al*, 2006b). For the first time, a complementary high-throughput approach was applied by  
254 performing both transcriptomic and methylomic analyses on the same samples. Moreover, the  
255 strength of this work is to highlight both the global geographical (ZIM/ZAM) and tissue layer  
256 (amnion vs. choriodecidua) differences in terms of DNA methylation and gene expression.  
257 Indeed, our methylomic study established a global profile of fetal membranes on the ZIM and  
258 ZAM samples. The number of hypermethylated genes in the amnion or the choriodecidua were  
259 more important in the ZAM than in the ZIM and allowed us to perform a GO-term classification  
260 focused on the ZAM, where cell adhesion, response to a stimulus, tissue development, and  
261 reproductive processes are significantly represented. We found some similarities with the  
262 transcriptomic analysis, where overexpressed genes in the choriodecidua ZAM were linked to  
263 biological adhesion (important in tissue integrity), regulation of cell proliferation, extracellular  
264 matrix organization, and responses to internal and external stimuli.

265 By cross-analyzing both methods for the ZAM, the link of 105 genes overexpressed in  
266 the choriodecidua and hypomethylated in the amnion with a MeSH disease terms (e.g.,  
267 pregnancy complication) was revealed. Especially for GO terms, these highlighted processes  
268 could be directly linked to preparation for parturition through a sterile inflammation cascade.  
269 We then turned our attention to TLR4, a major mediator of inflammation, for the following  
270 reasons. First, this upstream gatekeeper of innate immune activation was the only gene that  
271 appeared in each of the considered GO terms, as illustrated in Figure 3A. Second, it is an  
272 important partner of many other genes included in our 105 genes list (see Figure 3B). Third,  
273 TLR4 was already known to be expressed in the fetal membranes and cervixes of animals  
274 (Gonzalez *et al*, 2007; Harju *et al*, 2005; Moço *et al*, 2013) and to play a role as a key regulator  
275 in a sterile or septic inflammatory reaction in response to aggression by a pathogen-associated  
276 molecular pattern (PAMP)/damage-associated molecular pattern (DAMP), leading to PPROM  
277 (Chin *et al*, 2016; Li *et al*, 2010; Patni *et al*, 2007; Wang & Hirsch, 2003). Fourth, TLR4 is also  
278 known to be involved in parturition at the classical term of pregnancy, activating a sterile  
279 inflammation cascade (Choi *et al*, 2012; Wahid *et al*, 2015). Fifth, it could be considered a  
280 promising therapeutical target to prevent preterm birth through a better control of its pro-  
281 inflammatory signaling.

282 According to a previous study (Krol *et al*, 2010), and as confirmed by our qPCR and  
283 Western blot quantification, TLR4 was more expressed in the choriodecidua than in the amnion  
284 (Figure 4B and 4C). This overexpression could be due to a differential methylation and/or  
285 transcription factor fixations or could be a consequence of post-transcriptional regulation by  
286 miRNAs. miRNAs play crucial regulatory roles in biological and pathological processes. They  
287 are well-documented in gestational tissues, such as the placenta, endometrium, and fetal  
288 membranes (Doridot *et al*, 2014; Gu *et al*, 2013; Kamity *et al*, 2019; Montenegro *et al*, 2007;  
289 Wang *et al*, 2016). They have actually begun to be considered potential biomarkers for

290 pregnancy pathologies (Cretoiu *et al*, 2016), and studies have already shown that some miRNA  
291 expressions decrease in chorioamniotic membranes with gestational age uninfluenced by labor  
292 (Montenegro *et al*, 2007, 2009). We found two miRNAs (mir-125b-1 and let-7a-2) that were  
293 hypermethylated in the choriodecidua compared to the amnion that could potentially target  
294 TLR4 mRNA in the amnion to decrease its expression level. They were never known to be able  
295 to specifically target TLR4, leading us to demonstrate the consequences of their transfection on  
296 the quantification of the TLR4 mRNA and protein on the cell line AV3 or primary amniotic  
297 epithelial cells using the luciferase 3'UTR of the TLR4 reporter gene.

298 Surprisingly, these two miRNAs are part of a miR-100-let-7a-2 cluster host gene, also  
299 known as MIR100HG. This cluster has never been studied in relation to the placenta or fetal  
300 membrane environment, unlike others, such as C14MC, C19MC, and miR-371-3, whose  
301 expressions change during pregnancy between the whole and terminal villi (Gu *et al*, 2013;  
302 Morales-Prieto *et al*, 2013). In humans, 10 mature let-7s are synthesized and are implicated in  
303 different physiological and pathological events from embryogenesis to adult development, such  
304 as inflammatory responses and innate immunity (Roush & Slack, 2008); however, the latter  
305 finding could not be linked only to simple TLR4 targeting because both miRNAs were also  
306 already known to have implications for innate immunity by influencing not only the expression  
307 of interleukins and TNF $\alpha$  but also cell senescence—another well-known phenomenon  
308 occurring at the end of fetal membrane life (Iliopoulos *et al*, 2009; Nyholm *et al*, 2014; Schulte  
309 *et al*, 2011; Tili *et al*, 2007).

310 On a global scale, the exhaustive results obtained here provide causal information  
311 regarding the implication of inflammation in the physiological rupture of fetal membranes,  
312 whereas future studies are needed to exploit all the data accumulated during this work.  
313 Nevertheless, by focusing on a unique candidate, TLR4, a well-known actor in the physiological  
314 and pathological rupture of membranes, we have outlined the complex molecular process of

315 gene regulation and have proposed a fetal membrane layer-specific model to better understand  
316 fetal membrane ruptures (Figure 7). The latter could doubtlessly be extrapolated to other  
317 gestational tissues or resident immune cells, such as neutrophils, which are implicated in the  
318 amplification of the inflammatory response in late gestation. Moreover, this scheme shows that  
319 TLR4 could be an attractive drug target for prolonged gestation and could protect the fetus  
320 against inflammatory stress (Robertson *et al*, 2020).

321 All together, these data allow for the expectation of the emergence and promising  
322 clinical strategies for pregnant women to prevent PPRM, which will undoubtedly come from  
323 results such as ours regarding the physiological preparation of fetal membrane ruptures at term.

324

325

## 326 **MATERIALS AND METHODS**

### 327 **Ethics statements**

328           This study was approved by the regional institutional ethics committee, and informed  
329 consent was obtained from the participants. The experiments conformed to the principles set  
330 out in the World Medical Association Declaration of Helsinki.

331

### 332 **Human fetal membrane collection**

333           Nine fetal membranes were collected at full term before labor and birth by cesarean  
334 section (Obstetrics Department, Estaing University Hospital, Clermont-Ferrand, France). All  
335 patients were Caucasian and presented no pregnancy pathology (confirmed by macroscopic and  
336 microscopic placenta analyses and histological examinations that excluded chorioamnionitis).  
337 Supplementary Table S1 describes the patients' characteristics.

338           Four samples were collected from each patient (ZAM amnion, ZAM choriodecidua,  
339 ZIM amnion, and ZIM choriodecidua) as already described by Choltus *et al* (2020).

### 340 **Genome-wide DNA methylation**

341           Total genomic DNA from the amnion and choriodecidua was extracted using the  
342 QIAamp<sup>®</sup> DNA Mini Kit (Qiagen, Courtaboeuf, France) following the manufacturer's  
343 instructions. DNA concentration was determined by Qubit<sup>™</sup> quantitation (Invitrogen, Thermo  
344 Fisher Scientific, Illkirch, France). Five hundred ng of extracted DNA was bisulfite-treated  
345 using the EZ DNA Methylation<sup>™</sup> Kit (Proteogene, Saint-Marcel, France), following the  
346 manufacturer's standard protocol, and individually hybridized using HumanMethylation450  
347 Analysis BeadChip (Illumina, San Diego, California, USA), which allowed for studying the  
348 482,421 cytosines on the human genome. This array was conducted using Helixio (Saint-



349 Beauzire, France). Specific CpG probe methylation differences between the tissues taken from  
350 the ZIM and ZAM regions or between the amnion and choriodecidua were analyzed. To study  
351 each cytosine, methylation differences were defined as a change in  $\beta$  values ( $\Delta\beta$ ) between two  
352 conditions with p-values less than 0.05 (after applying a Student's paired t-test), and the Monte  
353 Carlo method (Metropolis and Ulam, 1949) was then used to randomly stimulate the minimal  
354 (m) and maximal (M)  $\Delta\beta$ -value for each chromosome. Such limits permitted us to keep only  
355 the cytosine in which  $\Delta\beta$  was inferior to M or superior to M. Gene probes meeting the cut-off  
356 criteria for each comparison were submitted for Database for Gene Ontology (GO) enrichment  
357 (<http://go.princeton.edu>) in association with the REVIGO web server (<http://revigo.irb.hr>; as  
358 previously described (Supek *et al*, 2011) to identify the biological processes associated with the  
359 genes that showed changes in methylation status.

360

### 361 **Human 8x60K expression arrays**

362 Total RNA was extracted using an RNeasy<sup>®</sup> Mini Kit (Qiagen) following the  
363 manufacturer's instructions. RNA samples were quantified with a NanoDrop<sup>™</sup>  
364 spectrophotometer (ThermoScientific, Thermo Fisher Scientific, Illkirch, France). The RNA  
365 integrity was evaluated using a 2100 Bioanalyzer (Agilent Technologies, Les Ullis, France) and  
366 an RNA 6000 Nano Assay Kit. The mean of the RNA integrity number (RIN) for all samples  
367 was 8.41.

368 A microarray (Sure Print G3 Human GE 8x60K) was performed by Helixio (Saint-  
369 Beauzire, France) in accordance with Agilent Technologies. The data were analyzed with  
370 Genespring GX 12.0 (Agilent Technologies).

371 The resulting gene lists from each pair-wise comparison (ZIM vs. ZAM and amnion vs.  
372 choriodecidua) were respectively filtered for the genes that showed 2.8-fold changes at  $p < 0.01$

373 using the Student–Newman–Keuls test with Benjamini–Hochberg corrections for false  
374 discovery rates. Raw data were analyzed with the R (<http://R-project.org>) and Bioconductor  
375 (<http://www.bioconductor.org>) software. A generic GO term finder (<http://go.princeton.edu>)  
376 and REVIGO (<http://revigo.irb.hr/>) with up- and downregulated probes were used to analyze  
377 the biological process of gene ontology (GO) enrichment, and GePS Genomatix software  
378 (Release 2.4.0 Genomatix® Software GmbH, Munich, Germany) was used for the analysis of  
379 MeSH diseases ( $p < 0.01$ ).

380

### 381 **TLR4 immunofluorescent staining**

382 Immunohistochemistry experiments performed on ZAM cryosections taken from the  
383 same samples (8  $\mu$ m) were fixed in paraformaldehyde (4 % in PBS); blocked with PBS-1X,  
384 Triton 0.1 %, and SVF 10%; and incubated overnight with a monoclonal mouse anti-TLR4  
385 antibody diluted 1:400 in PBS (Sc-293072, Santa-Cruz Biotechnology, Dallas, Texas, USA).  
386 A secondary antibody (donkey anti-mouse coupled with Alexia 488 Ig G [H+L]; Life  
387 Technologies, Thermo Fisher Scientific) diluted at 1:300 was incubated for 2 h on slides.  
388 Following Hoechst nuclear staining, the samples were examined under a LSM510 Zeiss  
389 confocal microscope (Zeiss, Oberkochen, Germany). For negative controls, sections were  
390 incubated without a primary antibody.

391

### 392 **Stimulation of fetal membrane explants by Lipopolysaccharide (LPS)**

393 Amnion and choriodecidua explants (2 cm<sup>2</sup>) were placed in six-well plates with 2 ml of  
394 DMEM/F12 (Gibco, Thermo Fisher Scientific) supplemented with 10 % fetal bovine serum  
395 (FBS, GE Healthcare, Vélizy-Villacoublay, France), 100 units/ml of penicillin, 100  $\mu$ g/ml of

396 Streptomycin, and 0.25 µg/ml of Amphotericin B (Hyclone, Thermo Fisher scientific) for 24 h.  
397 The medium was then removed and replaced with serum-free DMEM/F12. The explants were  
398 treated (or left untreated) with LPS from E.coli (O111:B4) at 0.5 µg/ml (Sigma-Aldrich Chimie,  
399 St. Quentin Fallavier, France) for 24 h. The treated explants and cell-free culture medium were  
400 collected and stored at -80 °C.

401

#### 402 **Cytokine analysis**

403 Secreted IL-6 and TNFα cytokines were measured in an amnion and choriodecidua-  
404 conditioned medium using a Bio-Plex Pro™ Human Cytokine 27-plex Assay (Bio-Rad, Marnes-  
405 la-Coquette, France) as recommended by the manufacturer along with Luminex technology.  
406 The results were standardized with the total protein concentration using a Pierce™ BCA Assay  
407 (Thermo Fisher Scientific).

408

#### 409 **Bisulfite conversion and combined restriction analysis**

410 Total DNA from the amnion and choriodecidua explants was bisulfite-treated using an  
411 EZ DNA methylation kit (Zymo Research, Proteogene). The converted DNAs were used as  
412 templates for the PCR reaction using specific primers of promoter TLR4 (containing the  
413 cytosine cg 05429895; promot-F: 5' TTTAGAGAGTTATAAGGGTTATTT 3', and promot-  
414 R: 5' CTAACA TCATCCT CACTACTTC 3'). The PCR was performed using HotStart DNA  
415 Polymerase (Qiagen), and the products were digested with Taq I (New England Biolabs, Evry,  
416 France) that could recognize CpGs.

417

418 **Cell cultures**

419 Primary amniocyte cells were collected from the amnion after trypsination and were  
420 cultured on six-well plates coated with bovine collagen type I/III (StemCell Technologies,  
421 Saint-Egrève, France) as described previously (Marceau *et al*, 2006; Prat *et al*, 2015). Human  
422 embryonic kidney (HEK) 293 cells were grown in Dulbecco's Modified Eagle Medium  
423 (DMEM; Gibco) supplemented with 10 % fetal bovine serum (FBS, GE healthcare), 4mM  
424 glutamine (Gibco), 1mM sodium pyruvate (Hyclone), 1x non-essential amino acids (Gibco),  
425 100 units/ml of penicillin, 100 µg/ml of Streptomycin, and 0.25 µg/ml of Amphotericin B  
426 (Hyclone).

427 Human epithelial amnion cells (AV3 cells, ATCC-CCL21; FL, ATCC-CCL62; WISH,  
428 ATCC-CCL25) were cultured in DMEM/F12 (Gibco) supplemented with 10 % fetal bovine  
429 serum (FBS, GE healthcare), 4 mM glutamine (Gibco), 100 units/ml of penicillin, 100 µg/ml  
430 of Streptomycin, and 0.25 µg/ml of Amphotericin B (Hyclone).

431

432 **Quantitative RT-PCR**

433 Total RNA was isolated from the amnion, choriodecidua, human epithelial amnion cells  
434 (AV3, FL, and WISH), and primary amniocyte cells using an RNeasy<sup>®</sup> Mini Kit (Qiagen) with  
435 DNase I digestion as described in the manufacturer's protocol. After quantification with a  
436 NanoDrop<sup>™</sup> spectrophotometer (Thermo Fisher Scientific), cDNA was synthesized from 1µg  
437 of RNA using a SuperScript<sup>™</sup> III First-Strand Synthesis System for RT-PCR (Invitrogen,  
438 Thermo Fisher Scientific). Quantitative RT-PCR reactions were performed with a LightCycler<sup>®</sup>  
439 480 (Roche Diagnostics, Meylan, France) using Power SYBR<sup>®</sup> Green Master Mix (Roche) and  
440 specific primers (described in supplementary Table S2). Transcripts were quantified using a  
441 standard curve method. The ratio of interest (transcript/geometric) mean of two housekeeping

442 genes (RPLP0 and RPS17) was determined. The results were obtained from at least three  
443 independent experiments, and all the steps followed the MIQE guidelines (Bustin *et al*, 2009).

444

#### 445 **Western blot**

446 Primary amniocyte and AV3 cells were lysed in a RIPA buffer (20 mM Tris-HCl pH =  
447 7.5, 150 mM NaCl, 1 % Nonidet P40, 0.5 % sodium deoxycholate, 1mM EDTA, 0.1 % SDS,  
448 1x Complete Protease inhibitor cocktail (Roche) for 30 min at 4 °C. The amnion and  
449 choriodecidua samples were homogenized as described (Choltus *et al*, 2020). The protein  
450 concentration of the supernatant was determined using a Pierce™ BCA Assay Kit (Pierce).  
451 Forty µg of denaturated proteins were subjected to a Western blot analysis after 4–15 %  
452 MiniPROTEAN® TGX StainFree™ gel electrophoresis (Bio-Rad) followed by probing  
453 antibodies against TLR4 or β-Actin (TLR4:1:400, Sc-293072, Santa-Cruz Biotechnology, β-  
454 Actin:1:10,000, MA1-91399, Thermo Fisher Scientific). The signal was detected with a  
455 peroxidase-labeled anti-mouse antibody at 1:10,000 (Sc-2005, Santa Cruz Biotechnology) and  
456 visualized with ECL or ECL2 Western blotting substrate (Pierce) using a ChemiDoc™ MP  
457 Imaging System and Image Lab™ software (Bio-Rad). The results were obtained from at least  
458 three independent experiments.

459

#### 460 **3'UTR-hTLR4 pMIR REPORT™ luciferase plasmid**

461 The 3'UTR hTLR4 (2,223 bp, NM 138554) was amplified from 100 ng of genomic  
462 amnion DNA with 3'UTR-TLR4 primers containing Spe I restriction sites to facilitate  
463 subcloning: forward GAGAACTAGTAGAGGAAAAATAAAAACCTCCTG and reverse  
464 GAGA ACTAGTTTGATATTATAAAACTGCATATATTTA. The PCR was performed with  
465 Phusion® high-fidelity DNA polymerase (New England Biolabs) according to the

466 manufacturer's instructions. After purification and digestion with Spe I (New England Biolabs),  
467 the fragment was subcloned into the Spe I site of the pMIR-REPORT™ luciferase vector  
468 (Ambion, Thermo Fisher scientific) to generate the construct pMIR-3'UTR-hTLR4. The insert  
469 sequence was checked by sequencing (Eurofins Genomics, Ebersberg, Germany).

#### 470 *In-silico* miRNA analysis

471 Putative miRNAs targeting the 3'UTR-TLR4 target gene miRNA were screened using  
472 the public database miRWalk with TargetScan, RNA22, and miRanda.

473

#### 474 **Dual-Luciferase® Reporter assays**

475 HEK293 cells were cultured in six-well plates, transiently transfected at an 80–90 %  
476 confluence using a Lipofectamine® 3000 Transfection Kit (Invitrogen, Thermo Fisher  
477 Scientific). Each well received 100 ng of the pMIR-REPORT™ Luciferase vector containing  
478 the 3'UTR-hTLR4 (without a negative control) in combination with 1µg pCMV-MIR or  
479 pCMV-pre-mir125b1 (OriGene Technologies, Rockville, Maryland, USA) or let7A2 generated  
480 in the laboratory and with 50 ng of pRL-TK Renilla luciferase plasmid (Promega).. Briefly, the  
481 pre-let7A2 was amplified from 100 ng of genomic amnion DNA with pre-let7A2 primers  
482 containing SgfI / MluI restriction sites to facilitate subcloning: forward  
483 GAGAGCGATCGCTCGTCAACAGATATCAGAAGGC and reverse  
484 GAGAACGCGTAATGCTGCATTTTTTGTGACAATTT. The PCR was performed with  
485 Advantage-HD DNA polymerase (Takara Bio, Saint-Germain-en-Laye, France) according to  
486 the manufacturer's instructions. After purification and digestion with SgfI / MluI (New England  
487 Biolabs), the fragment was subcloned into the SgfI / MluI site of the pCMV-MIR vector to  
488 generate the construct pCMV-pre-let7A2. The insert sequence was checked by sequencing

489 (Eurofins Genomics, Ebersberg, Germany). Luciferase activity was measured using the Dual-  
490 Luciferase<sup>®</sup> Reporter Assay System (Promega, Charbonnières-les-Bains, France) 48 h after  
491 transfection according to the manufacturer's instructions using a Sirius luminometer (Berthold,  
492 thoiry, France). Transfection efficiencies were normalized to the Renilla luciferase activities in  
493 the corresponding wells and reported to the control condition. Data were extracted from at least  
494 three experiments, each performed in triplicate.

495

#### 496 **Transfections of primary amniocytes and AV3 cells**

497 Primary amniocytes and AV3 were cultured in six-well plates. At 80–90 % of  
498 confluence, the cells were transiently transfected using a Lipofectamine<sup>®</sup> 3000 Transfection Kit  
499 (Invitrogen, thermos Fisher Scientific) according to the protocol with 1µg expressing plasmid  
500 of human pCMV pre-mir125b1, pre-let7A2, or a control (pCMV-MIR) purchased from  
501 OriGene. After 48 h or 72 h of culturing, total RNA and proteins were respectively collected  
502 and used for the qRT-PCR or Western blot experiments. Data were extracted from at least three  
503 experiments, each performed in triplicate.

504

#### 505 **Statistical analysis**

506 The results were analyzed using PRISM software (GraphPad Software Inc., San Diego,  
507 California, USA). The quantitative data were presented as the medians ± interquartile ranges  
508 according to a Shapiro–Wilks test. Non-normally distributed data between the two groups were  
509 studied with either a Wilcoxon matched-pairs signed rank test for paired samples or a Mann–  
510 Whitney U test for unpaired samples. To study several independent groups, a Kruskal–Wallis

511 test was performed followed by a Dunn's test. Values were considered significantly different  
512 at  $p < 0.05$ ,  $p < 0.01$ , or  $p < 0.001$  throughout.

513



514 **ACKNOWLEDGEMENTS**

515 LB was supported in carrying out this work by the Auvergne-Rhone-Alpes region's Jeune  
516 Chercheur framework. This research was conducted with the scientific support and expertise of  
517 Helixio (Saint-Beauzire, France).

518

519 **AUTHOR CONTRIBUTIONS**

520 CB, FPC, GC, MR, and CG conducted the experiments and acquired the data.

521 CB and BP conducted the statistical analyses.

522 DG, VS, and LB designed the research studies.

523 CB, VS, and LB wrote the manuscript.

524

525 **CONFLICT OF INTEREST:** The authors report no conflict of interest.

526

527

528 **DATA AVAILABILITY SECTION**

529 - Term W/O labor Fetal membrane methylation status results were submitted into Arrayexpress

530 (<http://www.ebi.ac.uk/arrayexpress/experiments/E-MTAB-10520>).

531 - Term W/O labor Fetal membrane mRNA expression results were submitted into Arrayexpress

532 (<http://www.ebi.ac.uk/arrayexpress/experiments/E-MTAB-10516>)

533

534 **REFERENCES**

- 535 Bustin SA, Benes V, Garson JA, Hellems J, Huggett J, Kubista M, Mueller R, Nolan T, Pfaffl MW,  
536 Shipley GL, *et al* (2009) The MIQE guidelines: minimum information for publication of  
537 quantitative real-time PCR experiments. *Clin Chem* 55: 611–622
- 538 Chin PY, Dorian CL, Hutchinson MR, Olson DM, Rice KC, Moldenhauer LM & Robertson SA (2016)  
539 Novel Toll-like receptor-4 antagonist (+)-naloxone protects mice from inflammation-induced  
540 preterm birth. *Sci Rep* 6: 36112
- 541 Choi SJ, Jung S-H, Eom M, Han KH, Chung I-B & Kim S-K (2012) Immunohistochemical distribution of  
542 toll-like receptor 4 in preterm human fetal membrane. *J Obstet Gynaecol Res* 38: 108–112
- 543 Choltus H, Lavergne M, Belville C, Gallot D, Minet-Quinard R, Durif J, Blanchon L & Sapin V (2020)  
544 Occurrence of a RAGE-mediated inflammatory response in human fetal membranes. *Front*  
545 *Physiol* 11
- 546 Cretoiu D, Xu J, Xiao J, Suci N & Cretoiu SM (2016) Circulating MicroRNAs as potential molecular  
547 biomarkers in the pathophysiological evolution of pregnancy. *Dis Markers* 2016: 3851054
- 548 Doridot L, Houry D, Gaillard H, Chelbi ST, Barbaux S & Vaiman D (2014) miR-34a expression,  
549 epigenetic regulation, and function in human placental diseases. *Epigenetics* 9: 142–151
- 550 Eidem HR, Ackerman WE, McGary KL, Abbot P & Rokas A (2015) Gestational tissue transcriptomics in  
551 term and preterm human pregnancies: a systematic review and meta-analysis. *BMC Med*  
552 *Genomics* 8: 27
- 553 El Khwad M, Pandey V, Stetzer B, Mercer BM, Kumar D, Moore RM, Fox J, Redline RW, Mansour JM &  
554 Moore JJ (2006) Fetal membranes from term vaginal deliveries have a zone of weakness  
555 exhibiting characteristics of apoptosis and remodeling. *J Soc Gynecol Investig* 13: 191–195
- 556 Enquobahrie DA, Hensley M, Qiu C, Abetew DF, Hevner K, Tadesse MG & Williams MA (2016)  
557 Candidate gene and MicroRNA expression in fetal membranes and preterm delivery risk.  
558 *Reprod Sci Thousand Oaks Calif* 23: 731–737
- 559 Gillaux C, Méhats C, Vaiman D, Cabrol D & Breuiller-Fouché M (2011) Functional screening of TLRs in  
560 human amniotic epithelial cells. *J Immunol* 187: 2766–2774
- 561 Goldenberg RL, Culhane JF, Iams JD & Romero R (2008) Epidemiology and causes of preterm birth.  
562 *Lancet Lond Engl* 371: 75–84
- 563 Gomez-Lopez N, St. Louis D, Lehr MA, Sanchez-Rodriguez EN & Arenas-Hernandez M (2014) Immune  
564 cells in term and preterm labor. *Cell Mol Immunol* 11: 571–581
- 565 Gonzalez JM, Xu H, Ofori E & Elovitz MA (2007) Toll-like receptors in the uterus, cervix, and placenta:  
566 is pregnancy an immunosuppressed state? *Am J Obstet Gynecol* 197: 296.e1–6
- 567 Gu Y, Sun J, Groome LJ & Wang Y (2013) Differential miRNA expression profiles between the first and  
568 third trimester human placentas. *Am J Physiol Endocrinol Metab* 304: E836–843
- 569 Haddad R, Tromp G, Kuivaniemi H, Chaiworapongsa T, Kim YM, Mazor M & Romero R (2006) Human  
570 spontaneous labor without histologic chorioamnionitis is characterized by an acute  
571 inflammation gene expression signature. *Am J Obstet Gynecol* 195: 394.e1–24

- 572 Han YM, Romero R, Kim J-S, Tarca AL, Kim SK, Draghici S, Kusanovic JP, Gotsch F, Mittal P, Hassan SS,  
573 *et al* (2008) Region-specific gene expression profiling: novel evidence for biological  
574 heterogeneity of the human amnion. *Biol Reprod* 79: 954–961
- 575 Harju K, Ojaniemi M, Rounioja S, Glumoff V, Paananen R, Vuolteenaho R & Hallman M (2005)  
576 Expression of toll-like receptor 4 and endotoxin responsiveness in mice during perinatal  
577 period. *Pediatr Res* 57: 644–648
- 578 Iliopoulos D, Hirsch HA & Struhl K (2009) An epigenetic switch involving NF-kappaB, Lin28, Let-7  
579 MicroRNA, and IL6 links inflammation to cell transformation. *Cell* 139: 693–706
- 580 Joyce EM, Moore JJ & Sacks MS (2009) Biomechanics of the fetal membrane prior to mechanical  
581 failure: review and implications. *Eur J Obstet Gynecol Reprod Biol* 144 Suppl 1: S121-127
- 582 Kamity R, Sharma S & Hanna N (2019) MicroRNA-mediated control of inflammation and tolerance in  
583 pregnancy. *Front Immunol* 10: 718
- 584 Kawai T & Akira S (2010) The role of pattern-recognition receptors in innate immunity: update on  
585 toll-like receptors. *Nat Immunol* 11: 373–384
- 586 Kendal-Wright CE (2007) Stretching, mechanotransduction, and proinflammatory cytokines in the  
587 fetal membranes. *Reprod Sci Thousand Oaks Calif* 14: 35–41
- 588 Kim J, Pitlick MM, Christine PJ, Schaefer AR, Saleme C, Comas B, Cosentino V, Gadow E & Murray JC  
589 (2013) Genome-wide analysis of DNA methylation in human amnion. *ScientificWorldJournal*  
590 2013: 678156
- 591 Kim JK, Samaranayake M & Pradhan S (2009) Epigenetic mechanisms in mammals. *Cell Mol Life Sci*  
592 *CMLS* 66: 596–612
- 593 Konwar C, Price EM, Wang LQ, Wilson SL, Terry J & Robinson WP (2018) DNA methylation profiling of  
594 acute chorioamnionitis-associated placentas and fetal membranes: insights into epigenetic  
595 variation in spontaneous preterm births. *Epigenetics Chromatin* 11
- 596 Krol J, Loedige I & Filipowicz W (2010) The widespread regulation of microRNA biogenesis, function  
597 and decay. *Nat Rev Genet* 11: 597–610
- 598 Li L, Kang J & Lei W (2010) Role of Toll-like receptor 4 in inflammation-induced preterm delivery. *Mol*  
599 *Hum Reprod* 16: 267–272
- 600 Li R, Ackerman WE, Summerfield TL, Yu L, Gulati P, Zhang J, Huang K, Romero R & Kniss DA (2011)  
601 Inflammatory gene regulatory networks in amnion cells following cytokine stimulation:  
602 translational systems approach to modeling human parturition. *PLoS One* 6: e20560
- 603 Lim S, MacIntyre DA, Lee YS, Khanjani S, Terzidou V, Teoh TG & Bennett PR (2012) Nuclear factor  
604 kappa B activation occurs in the amnion prior to labour onset and modulates the expression  
605 of numerous labour associated genes. *PLoS One* 7: e34707
- 606 Luo X, Shi Q, Gu Y, Pan J, Hua M, Liu M, Dong Z, Zhang M, Wang L, Gu Y, *et al* (2013) LncRNA pathway  
607 involved in premature preterm rupture of membrane (PPROM): an epigenomic approach to  
608 study the pathogenesis of reproductive disorders. *PLoS One* 8: e79897

- 609 Marceau G, Gallot D, Borel V, Lémery D, Dastugue B, Dechelotte P & Sapin V (2006) Molecular and  
610 metabolic retinoid pathways in human amniotic membranes. *Biochem Biophys Res Commun*  
611 346: 1207–1216
- 612 Mauri A, Perrini M, Mateos JM, Maake C, Ochsenein-Koelble N, Zimmermann R, Ehrbar M & Mazza  
613 E (2013) Second harmonic generation microscopy of fetal membranes under deformation:  
614 normal and altered morphology. *Placenta* 34: 1020–1026
- 615 McLaren J, Malak TM & Bell SC (1999) Structural characteristics of term human fetal membranes  
616 prior to labour: identification of an area of altered morphology overlying the cervix. *Hum*  
617 *Reprod Oxf Engl* 14: 237–241
- 618 McLaren J, Taylor DJ & Bell SC (2000) Increased concentration of pro-matrix metalloproteinase 9 in  
619 term fetal membranes overlying the cervix before labor: implications for membrane  
620 remodeling and rupture. *Am J Obstet Gynecol* 182: 409–416
- 621 McParland PC, Taylor DJ & Bell SC (2003) Mapping of zones of altered morphology and chorionic  
622 connective tissue cellular phenotype in human fetal membranes (amniochorion and decidua)  
623 overlying the lower uterine pole and cervix before labor at term. *Am J Obstet Gynecol* 189:  
624 1481–1488
- 625 Medzhitov R, Preston-Hurlburt P & Janeway CA (1997) A human homologue of the Drosophila Toll  
626 protein signals activation of adaptive immunity. *Nature* 388: 394–397
- 627 Metropolis N & Ulam S (1949) The Monte Carlo method. *J Am Stat Assoc* 44: 335–341
- 628 Moço NP, Martin LF, Pereira AC, Poletini J, Peraçoli JC, Coelho KIR & da Silva MG (2013) Gene  
629 expression and protein localization of TLR-1, -2, -4 and -6 in amniochorion membranes of  
630 pregnancies complicated by histologic chorioamnionitis. *Eur J Obstet Gynecol Reprod Biol*  
631 171: 12–17
- 632 Montenegro D, Romero R, Kim SS, Tarca AL, Draghici S, Kusanovic JP, Kim JS, Lee DC, Erez O, Gotsch  
633 F, *et al* (2009) Expression patterns of microRNAs in the chorioamniotic membranes: a role for  
634 microRNAs in human pregnancy and parturition. *J Pathol* 217: 113–121
- 635 Montenegro D, Romero R, Pineles BL, Tarca AL, Kim YM, Draghici S, Kusanovic JP, Kim J-S, Erez O,  
636 Mazaki-Tovi S, *et al* (2007) Differential expression of microRNAs with progression of  
637 gestation and inflammation in the human chorioamniotic membranes. *Am J Obstet Gynecol*  
638 197: 289.e1–6
- 639 Morales-Prieto DM, Ospina-Prieto S, Chaiwangyen W, Schoenleben M & Markert UR (2013)  
640 Pregnancy-associated miRNA-clusters. *J Reprod Immunol* 97: 51–61
- 641 Musilova I, Kutová R, Pliskova L, Stepan M, Menon R, Jacobsson B & Kacerovsky M (2015)  
642 Intraamniotic inflammation in women with preterm pre-labor rupture of membranes. *PLoS*  
643 *One* 10: e0133929
- 644 Newton K & Dixit VM (2012) Signaling in innate immunity and inflammation. *Cold Spring Harb*  
645 *Perspect Biol* 4
- 646 Nhan-Chang C-L, Romero R, Tarca AL, Mittal P, Kusanovic JP, Erez O, Mazaki-Tovi S, Chaiworapongsa  
647 T, Hotra J, Than NG, *et al* (2010) Characterization of the transcriptome of chorioamniotic

- 648 membranes at the site of rupture in spontaneous labor at term. *Am J Obstet Gynecol* 202:  
649 462.e1–41
- 650 Nyholm AM, Lerche CM, Manfé V, Biskup E, Johansen P, Morling N, Thomsen BM, Glud M &  
651 Gniadecki R (2014) miR-125b induces cellular senescence in malignant melanoma. *BMC*  
652 *Dermatol* 14: 8
- 653 Osman I, Young A, Jordan F, Greer IA & Norman JE (2006) Leukocyte density and proinflammatory  
654 mediator expression in regional human fetal membranes and decidua before and during  
655 labor at term. *J Soc Gynecol Investig* 13: 97–103
- 656 Patni S, Flynn P, Wynen LP, Seager AL, Morgan G, White JO & Thornton CA (2007) An introduction to  
657 toll-like receptors and their possible role in the initiation of labour. *BJOG Int J Obstet*  
658 *Gynaecol* 114: 1326–1334
- 659 Poltorak A, He X, Smirnova I, Liu MY, Van Huffel C, Du X, Birdwell D, Alejos E, Silva M, Galanos C, *et al*  
660 (1998) Defective LPS signaling in C3H/HeJ and C57BL/10ScCr mice: mutations in Tlr4 gene.  
661 *Science* 282: 2085–2088
- 662 Prat C, Bouvier D, Comptour A, Marceau G, Belville C, Clairefond G, Blanc P, Gallot D, Blanchon L &  
663 Sapin V (2015) All-trans-retinoic acid regulates aquaporin-3 expression and related cellular  
664 membrane permeability in the human amniotic environment. *Placenta* 36: 881–887
- 665 Robertson SA, Hutchinson MR, Rice KC, Chin P-Y, Moldenhauer LM, Stark MJ, Olson DM & Keelan JA  
666 (2020) Targeting Toll-like receptor-4 to tackle preterm birth and fetal inflammatory injury.  
667 *Clin Transl Immunol* 9: e1121
- 668 Romero R, Espinoza J, Gonçalves LF, Kusanovic JP, Friel LA & Nien JK (2006a) Inflammation in preterm  
669 and term labour and delivery. *Semin Fetal Neonatal Med* 11: 317–326
- 670 Romero R, Espinoza J, Kusanovic JP, Gotsch F, Hassan S, Erez O, Chaiworapongsa T & Mazor M  
671 (2006b) The preterm parturition syndrome. *BJOG Int J Obstet Gynaecol* 113 Suppl 3: 17–42
- 672 Roush S & Slack FJ (2008) The let-7 family of microRNAs. *Trends Cell Biol* 18: 505–516
- 673 Schulte LN, Eulalio A, Mollenkopf H-J, Reinhardt R & Vogel J (2011) Analysis of the host microRNA  
674 response to Salmonella uncovers the control of major cytokines by the let-7 family. *EMBO J*  
675 30: 1977–1989
- 676 Silva M de C, Richardson LS, Kechichian T, Urrabaz-Garza R, Silva MG da & Menon R (2020)  
677 Inflammation, but not infection, induces EMT in human amnion epithelial cells. *Reproduction*  
678 160: 627–638
- 679 Stephen GL, Lui S, Hamilton SA, Tower CL, Harris LK, Stevens A & Jones RL (2015) Transcriptomic  
680 profiling of human choriodecidual during term labor: inflammation as a key driver of labor.  
681 *Am J Reprod Immunol N Y N* 1989 73: 36–55
- 682 Supek F, Bošnjak M, Škunca N & Šmuc T (2011) REVIGO summarizes and visualizes long lists of gene  
683 ontology terms. *PloS One* 6: e21800
- 684 Tili E, Michaille J-J, Cimino A, Costinean S, Dumitru CD, Adair B, Fabbri M, Alder H, Liu CG, Calin GA, *et*  
685 *al* (2007) Modulation of miR-155 and miR-125b levels following lipopolysaccharide/TNF-

- 686           alpha stimulation and their possible roles in regulating the response to endotoxin shock. *J*  
687           *Immunol Baltim Md* 1950 179: 5082–5089
- 688   Wahid HH, Dorian CL, Chin PY, Hutchinson MR, Rice KC, Olson DM, Moldenhauer LM & Robertson SA  
689           (2015) Toll-like receptor 4 is an essential upstream regulator of on-time parturition and  
690           perinatal viability in mice. *Endocrinology* 156: 3828–3841
- 691   Wang H & Hirsch E (2003) Bacterially-induced preterm labor and regulation of prostaglandin-  
692           metabolizing enzyme expression in mice: the role of toll-like receptor 4. *Biol Reprod* 69:  
693           1957–1963
- 694   Wang H, Ogawa M, Wood JR, Bartolomei MS, Sammel MD, Kusanovic JP, Walsh SW, Romero R &  
695           Strauss JF (2008) Genetic and epigenetic mechanisms combine to control MMP1 expression  
696           and its association with preterm premature rupture of membranes. *Hum Mol Genet* 17:  
697           1087–1096
- 698   Wang Y, Lv Y, Gao S, Zhang Y, Sun J, Gong C, Chen X & Li G (2016) MicroRNA profiles in spontaneous  
699           decidualized menstrual endometrium and early pregnancy decidua with successfully  
700           implanted embryos. *PloS One* 11: e0143116
- 701   Waters TP & Mercer B (2011) Preterm PROM: prediction, prevention, principles. *Clin Obstet Gynecol*  
702           54: 307–312
- 703   Yoo JY, You Y-A, Kwon EJ, Park MH, Shim S & Kim YJ (2018) Differential expression and methylation of  
704           integrin subunit alpha 11 and thrombospondin in the amnion of preterm birth. *Obstet*  
705           *Gynecol Sci* 61: 565
- 706
- 707

708 **FIGURE LEGENDS**

709

710 **Figure 1: Differential cytosine methylation is analyzed for the ZIM and the ZAM.**

711 A Genes affected by differential methylation between the amnion and the choriodecidua,  
712 separately studied for the ZIM (left) and the ZAM (right).

713 B Four-way Venn diagram representing the number of genes with hypermethylated cytosines  
714 in the ZIM and the ZAM according to the methylomic analyses.  $mA > mC$ : a specific gene  
715 was more methylated in the amnion than in the choriodecidua.  $mA < mC$ : a specific gene  
716 was less methylated in the amnion than in the choriodecidua.

717 C GO-term classifications for genes observed specifically in the ZAM:  $mA > mC$  (left panel)  
718 and  $mA < mC$  (right panel). A Bonferroni correction was conducted for p-values  $< 0.01$ .

719

720 **Figure 2: Transcriptomic assay is analyzed for the ZAM in fetal membranes.**

721 A Volcano plots represent the  $\log_{10}$  adjusted p-values versus the  $\log_2$  fold change (FC). Up-  
722 and downregulated genes are shown in red and blue, respectively, limited by  $|\log_2 FC| = 2.8$ .  
723 They are classified in a four-way-Venn diagram representing the gene numbers in the ZIM  
724 and ZAM analyses with  $|\log_2 FC| = 2.8$ .

725 B GO-term classifications are shown for genes expressed only in the ZAM for  $\log_2 FC < 2.8$   
726 (Bonferroni correction for p-values  $< 0.01$ )

727 C GO-term classifications are shown for genes expressed only in the ZAM for  $\log_2 FC > 2.8$   
728 (uncorrected p-value  $< 0.01$ ).

729

730 **Figure 3: Common genes are observed between the  $mA > mC$  methylomic results and the**  
731 **choriodecidua/amnion transcriptomic analysis in the ZAM.**



732 A GO terms' representative distribution and their log<sub>10</sub> p-values are shown for the 105 common  
733 genes across both genome-wide studies.

734 B Representative TLR4 immunofluorescence (green staining) in the ZAM of fetal membranes  
735 in the confocal analyses. Cell nuclei were visualized with Hoescht (blue) staining. A negative  
736 control was used without a primary antibody. Slides were observed at x250 magnification  
737 for total fetal membranes (left and right): scale bar:50µm and x400 for the amnion (middle):  
738 scale bar: 20µm.

739 C Luminex technology was used to detect physiological IL-6 and TNF-α levels and to  
740 demonstrate no (or a weak) presence of this interleukin in the amnion or the choriodecidua  
741 (NT condition). After treatment for 24 h with LPS (0.5µg/ml), the levels of IL-6 and TNF-α  
742 significantly increased (n=4). Median ± interquartile ranges are represented (Wilcoxon test  
743 \* p-value < 0.05).

744

745 **Figure 4: The expression level of the TLR4 gene is related to its cytosine methylation level**  
746 **in the amnion and the choriodecidua.**

747 A Top: The median ± interquartile ranges of the DNA methylation levels of the five cg probes  
748 on the TLR4 gene in the amnion and choriodecidua ZAMs. Each dot represents the  
749 individual β-value for one patient (n = 9). The probe set with significant differential  
750 methylation between the amnion and choriodecidua (Wilcoxon test) is designated by an  
751 asterisk (\*\* p-value < 0.01, NS = not significant). Bottom: Control of the difference of  
752 methylation for the cg 05429895 between the amnion and the choriodecidua after digestion  
753 with Taq I. PCR products (438 bp) obtained after DNA bisulfite treatment. This probe,  
754 methylated in the amnion, was sensitive to Taq I and gave two fragments after digestion:  
755 307 bp and 131 bp.

756 B Relative expression of TLR4 transcripts for the nine samples of choriodecidua ZAM were  
757 significantly higher than for the amnion ZAM (Wilcoxon test \* p-value < 0.05).

758 C The TLR4 protein was significantly overexpressed for the nine samples in the choriodecidua  
759 compared to the amnion (Wilcoxon test \* p-value < 0.05).

760

761 **Figure 5: Two miRNAs potentially targeting the human 3'UTR-TLR4 are differentially**  
762 **methyated in the ZAM between the amnion and the choriodecidua.**

763 A *In-silico* computational target prediction analysis using TargetScan of the human 3'UTR-  
764 TLR4. This zone may be targeted by gene coding for MIR125B1 and LET7A2.

765 B The median  $\pm$  interquartile ranges of the DNA methylation cg probe levels for the MIR125B1  
766 (top) and LET7A2 (bottom) genes for the nine samples in the amnion and choriodecidua  
767 ZAM. Each dot represents the individual  $\beta$ -value for one patient. The probe set with  
768 significant differential methylation between the amnion and choriodecidua (Wilcoxon test)  
769 is designated by an asterisk (\*\* p-value < 0.01, NS = not significant).

770 C The relative expression of pri-miR-125b-1 and pri-let-7a-2 was determined for the nine  
771 samples. qRT-PCR experiments performed (n = 9) for each zone, and tissue demonstrated  
772 that pri-miR-125b-1 was significantly overexpressed in the amnion compared to the  
773 choriodecidua ZAM, as expected from the differential methylation status (Wilcoxon test \*  
774 p-value < 0.05). The pri-let-7a-2 amount could not be rigorously determined (ND).

775

776 **Figure 6: miR-125b-1 and let-7a-2 target the human 3'UTR-TLR4 and decrease TLR4**  
777 **expression**

778 A Targeting of miR-125b-1 and let-7a-2 to the human 3'UTR of TLR4 mRNA using a  
779 Luciferase Reporter Gene Assay depending on human 3'UTR-TLR4 (pMIR-3'UTR TLR4-  
780 luc). HEK293 cells co-transfected for 48 h with this construction and expressing plasmid

781 of human pCMV, pre-mir125b1, or let7A2. Luciferase activity was normalized with the  
782 pRL-TK- Renilla-luciferase level (median  $\pm$  interquartile range, \*\*\* p-value  $<$  0.01). The  
783 results showed that both miRNAs were able to target the 3'-UTR zone of the TLR4 gene  
784 and to decrease luciferase quantity (n=3).

785 B Determination of endogenous TLR4 expression levels in human cell lines (HEK293 from  
786 embryonic kidney, and FL, Wish, and AV3 from amniocytes) and in primary amniocyte  
787 cells quantified by qRT-PCR (n=4).

788 C Effects of miR-125b-1, let-7a-2, and the combination miR-125b-1 + let-7a-2 on TLR4 mRNA  
789 expression (left) and TLR4 protein (right) in AV3 cells (n=4). Cells were transfected with  
790 expressing plasmid of human pCMV, or pre-mir125b1, or let7A2 and miR-125b-1 + let-  
791 7a-2 for 12 h and 24 h for mRNA, and 24 h and 48 h for protein (median  $\pm$  interquartile  
792 range, \* p-value  $<$  0.05, \*\* p-value  $<$  0.01).

793 D Effects of miR-125b-1, let-7a-2, and the combination miR-125b-1 + let-7a-2 on TLR4  
794 mRNA expression (left) at 48 h and TLR4 protein (right) at 72 h in primary amniocyte  
795 cells (median  $\pm$  interquartile ranges, respectively; \* p-value  $<$  0.05, \*\* p-value  $<$  0.01, and  
796 \*\*\* p-value  $<$  0.001) (n=4).

797

798 **Figure 7: A model for the regulation of TLR4 expression in human fetal membranes is**  
799 **proposed.**

800

801

802 **SUPPLEMENTARY TABLES:**

803 **Table S1: Perinatal characteristics of the enrolled patients.**

804 F = Female, M = Male. Data are expressed as the mean  $\pm$  SEM.

805 **Table S2: Primer sequences used for the PCR.**

806 **Table S3: List of specific genes extracted from the ZAM zone after a transcriptomic**  
807 **analysis.**

808 **Table S4: List of jointly hypermethylated genes in the ZAM choriodecidua and**  
809 **overexpressed in the ZAM amnion.**

810 **Table S5: List of disease mesh-terms associated with hypermethylated genes in the ZAM**  
811 **choriodecidua and overexpressed in the ZAM Amnion.**

812 **Table S6: List of jointly hypermethylated genes in the ZAM amnion and overexpressed**  
813 **in the ZAM choriodecidua.**

814 **Table S7: List of disease mesh-terms associated with hypermethylated genes in the ZAM**  
815 **amnion and overexpressed in the ZAM choriodecidua.**

816

817

|                     | ZIM                                      |                                                  | ZAM                                      |                                                  |
|---------------------|------------------------------------------|--------------------------------------------------|------------------------------------------|--------------------------------------------------|
|                     | Hypermethylated Cytosines in Amnion (mA) | Hypermethylated Cytosines in Choriondecidua (mC) | Hypermethylated Cytosines in Amnion (mA) | Hypermethylated Cytosines in Choriondecidua (mC) |
| <b>Genes Number</b> | <b>322</b>                               | <b>1424</b>                                      | <b>5086</b>                              | <b>4744</b>                                      |

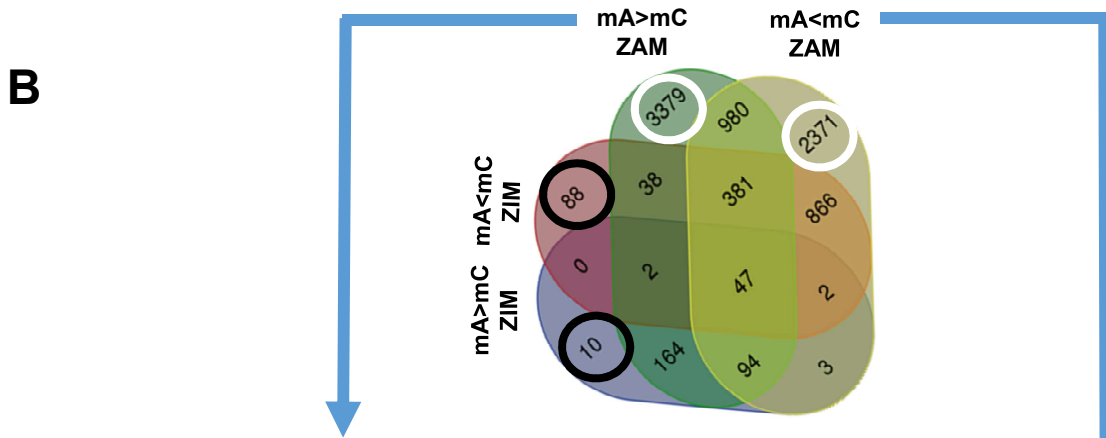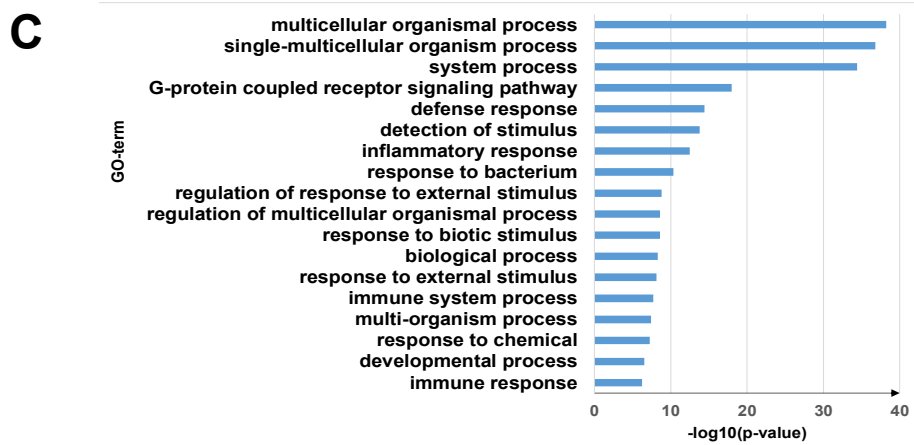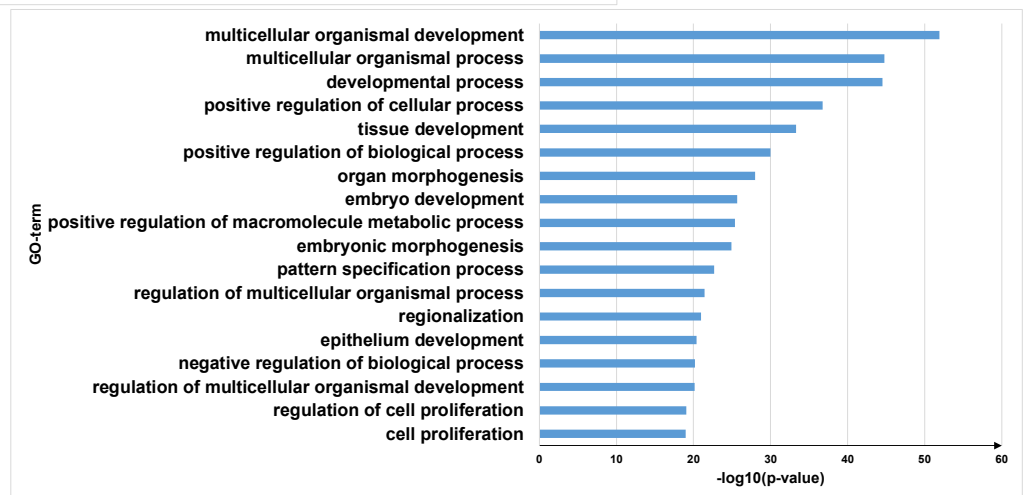

**Figure 1**

**B** ZAM log2 FC <2,8

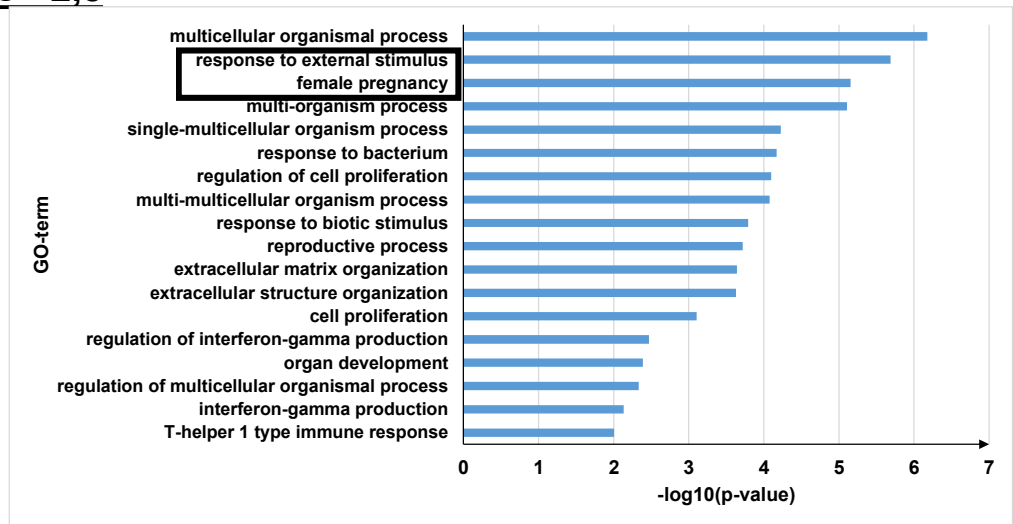

**A**

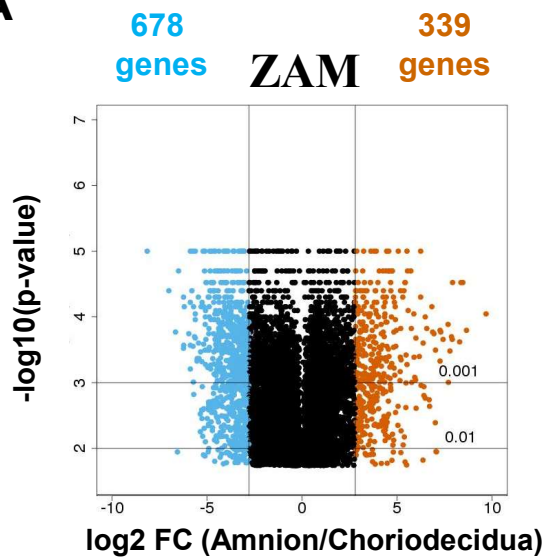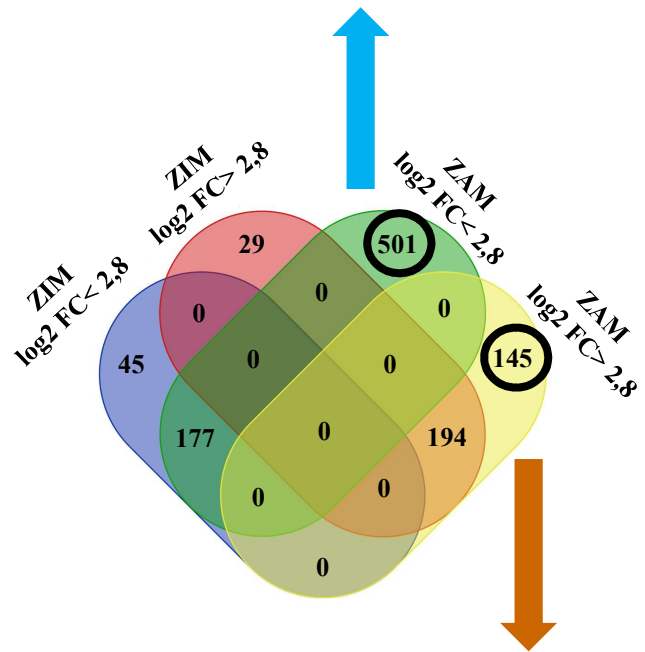

**C** ZAM log2 FC >2,8

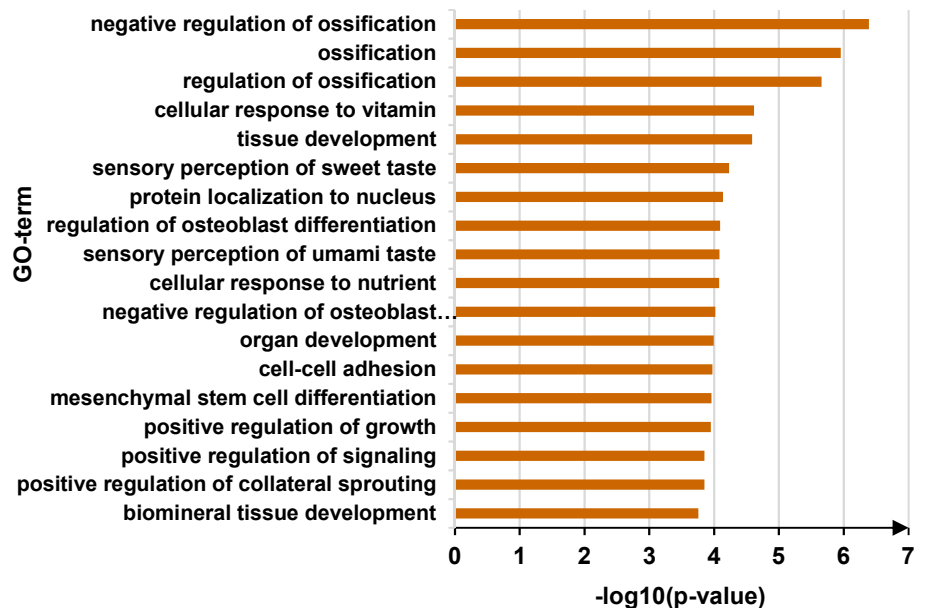

**Figure 2**

**A**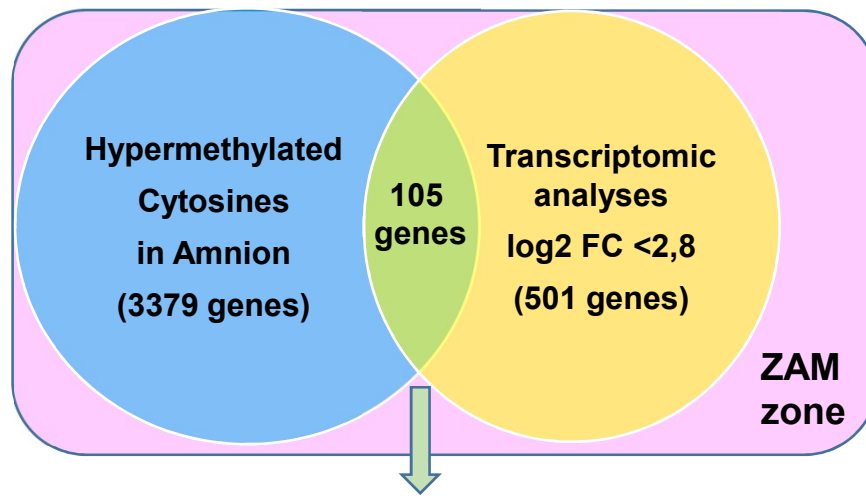

| GO-term                              | $-\log_{10}(\text{p-value})$ |
|--------------------------------------|------------------------------|
| Extracellular structure organization | 6,93                         |
| Response to external stimulus        | 5,07                         |
| Detection of lipopolysaccharide      | 3,8                          |
| Inflammatory response                | 3,29                         |

**B**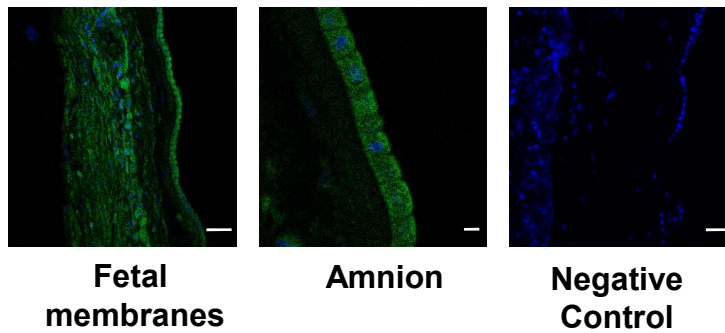**C**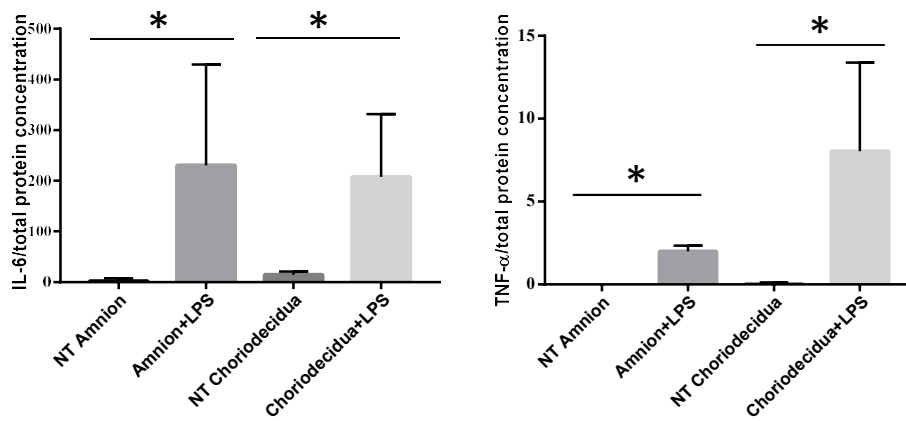**Figure 3**

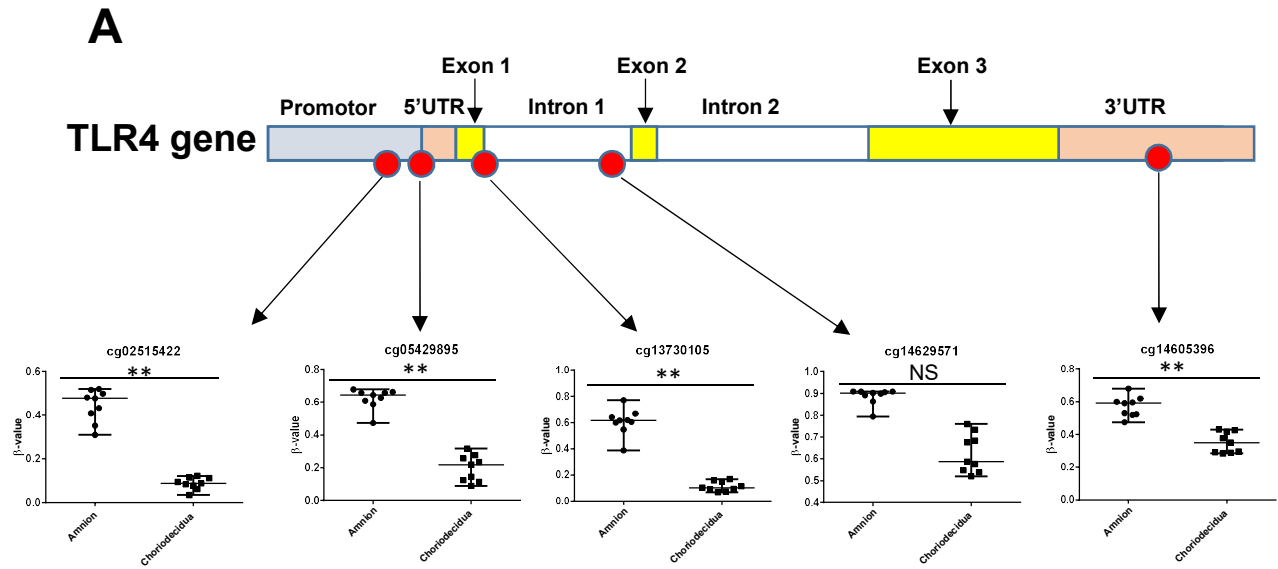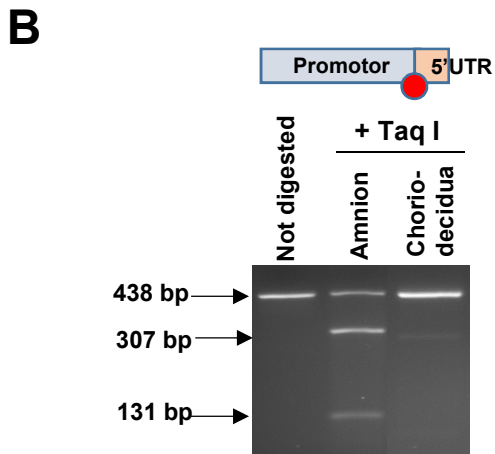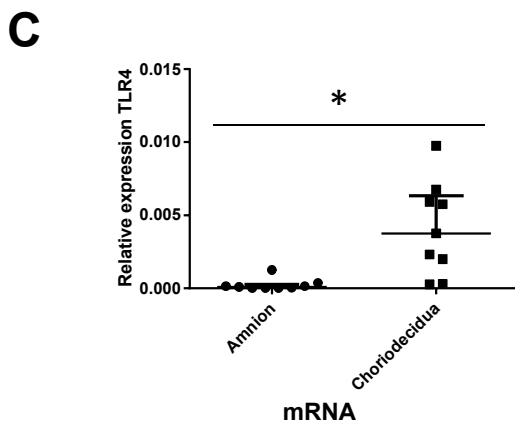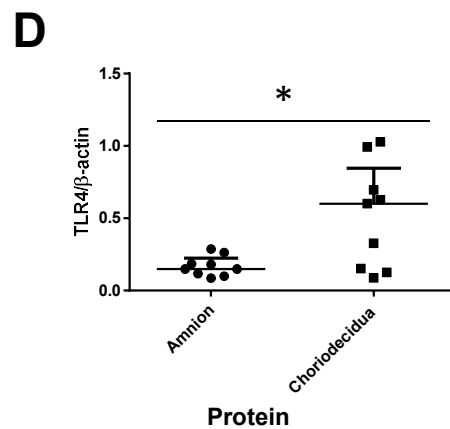

**Figure 4**



**A**

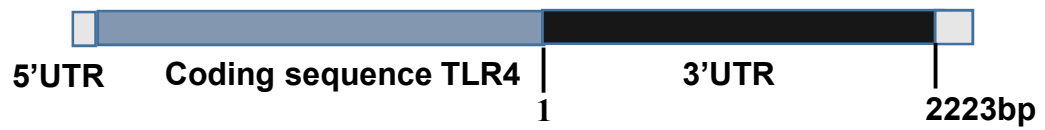

Position 267-273 of TLR4 3'UTR 5' ...AGUCAUUUCAACUCU- UACCUCAU...  
hsa-let-7a-5p 3' UGAUAUGUUGGAUGAUGGAGU

Position 1338-1344 of TLR4 3'UTR 5' ...ACAUCAGGAUGUCAUCAGGGAA...  
hsa-miR-125b-5p 3' AGUGUCAAUCCCAGAGUCCCU

**Figure 5**

**B**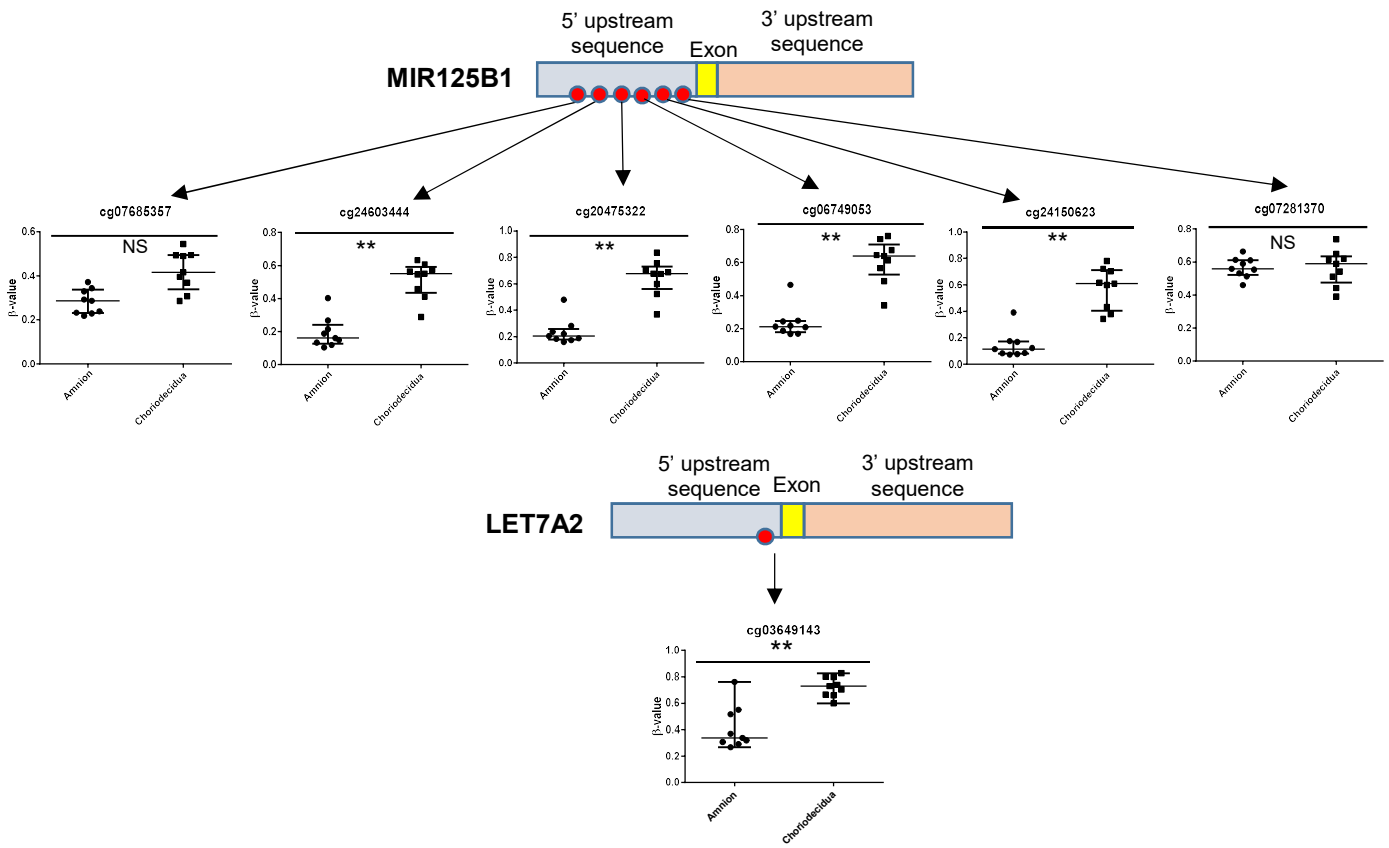**C**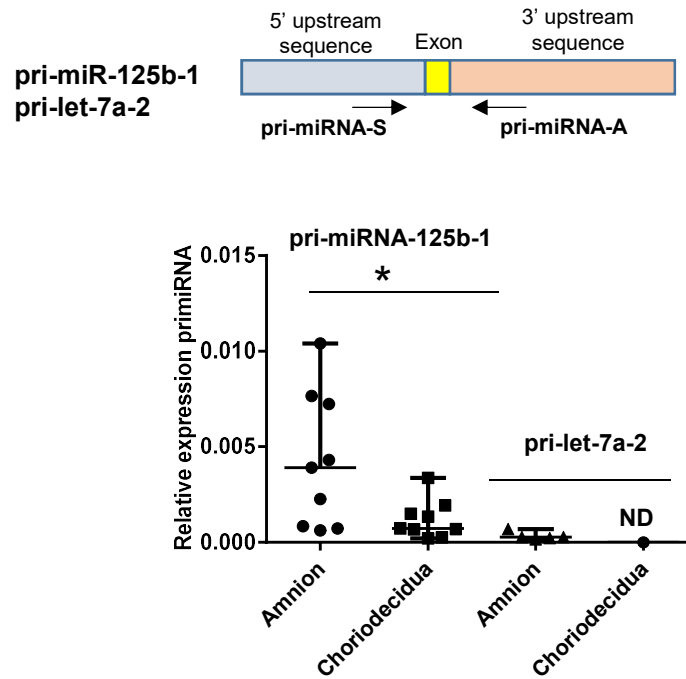**Figure 5**

**A**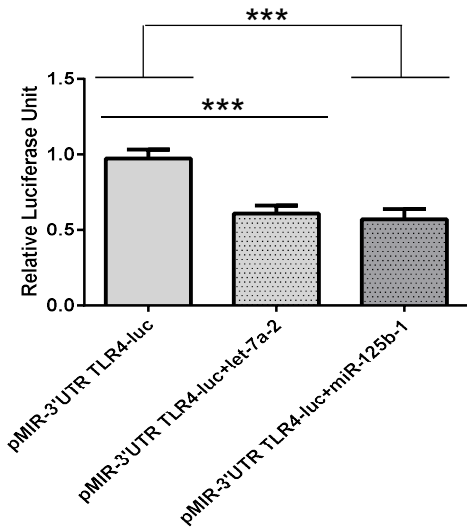**B**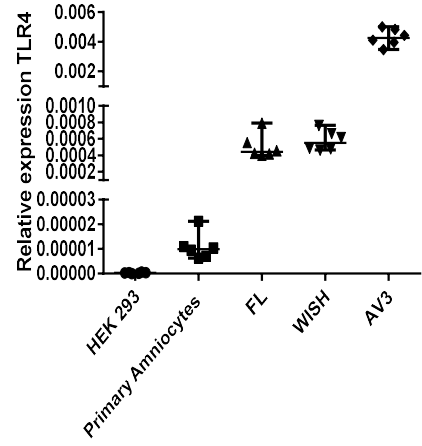**C**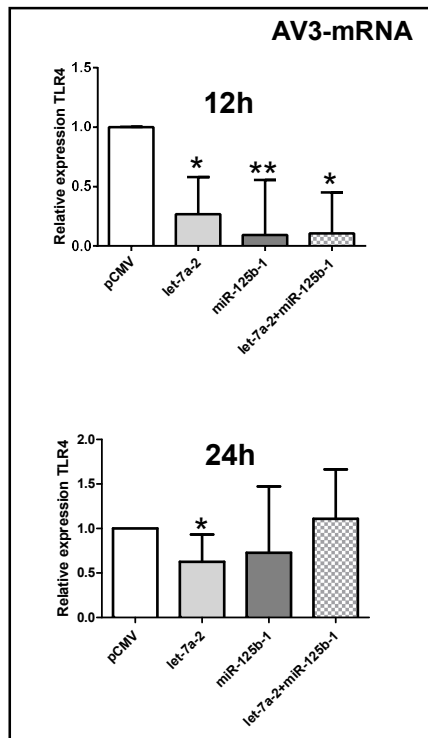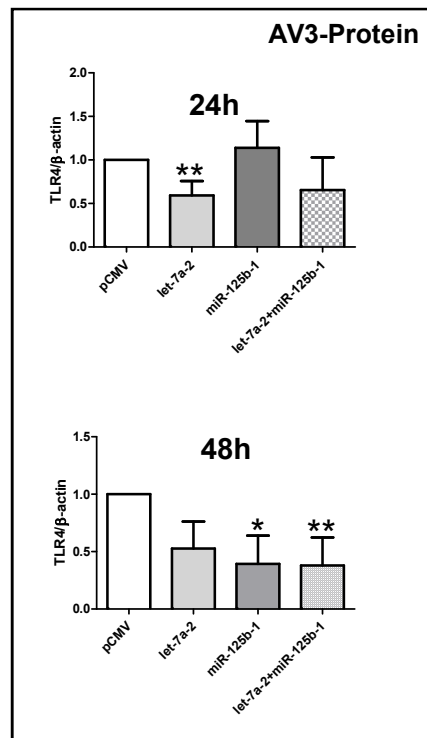**D**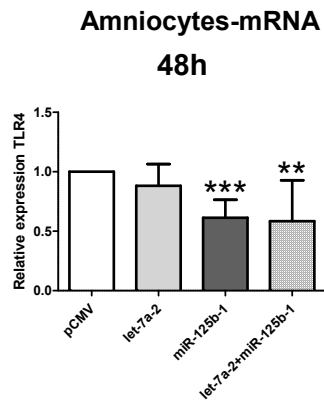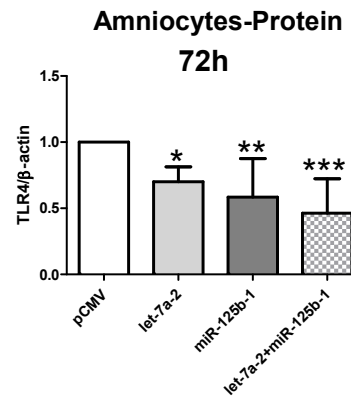**Figure 6**

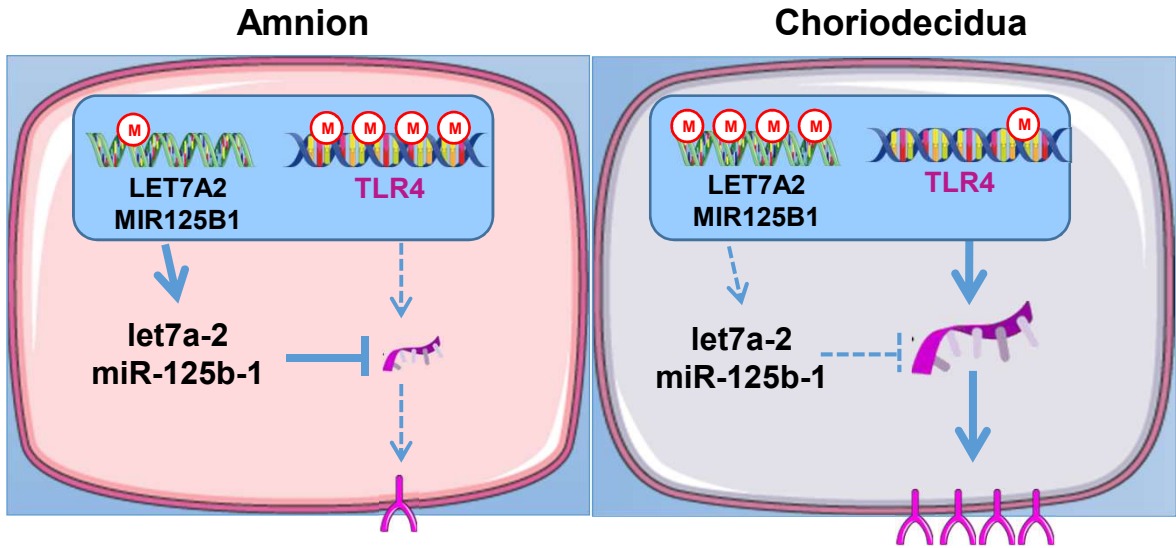

Figure 7

**Table S1 :**

**Perinatal characteristics of the enrolled patients.**

| <b>Perinatal characteristics</b>                      | <b>n=9</b>   |
|-------------------------------------------------------|--------------|
| <b>Maternal Age (years)</b>                           | 32.33 ± 1.76 |
| <b>Gestational age at delivery (Amenorrhea weeks)</b> | 39.10 ± 0.08 |
| <b>Body Mass Index, BMI</b>                           | 23.75 ± 0.95 |
| <b>Child sexe</b>                                     | 5F, 4M       |
| <b>Birth weight (g)</b>                               | 3351 ± 129   |

**Table S2:**

**Primer sequences used for the PCR.**

| <b>Human Gene</b> | <b>Sequence (5'→3')</b> | <b>Product length (bp)</b> | <b>NCBI Reference</b> |
|-------------------|-------------------------|----------------------------|-----------------------|
| hTLR4-S           | ACCAAGAACCTGGACCTGAG    | 181                        | NM_138554             |
| hTLR4-A           | TCTGGATGGGGTTTCCTGTC    |                            |                       |
| hRPLP0-S          | AGGCTTTAGGTATCACCCT     | 219                        | NM_053275             |
| hRPLP0-A          | GCAGAGTTTCCTCTGTGATA    |                            |                       |
| hRPS17-S          | TGCGAGGAGATCGCCATTATC   | 170                        | NM_001021             |
| hRPS17-A          | AAGGCTGAGACCTCAGGAAC    |                            |                       |
| hpri-125B1-S      | CGAACAGAAATTGCCTGTCATTC | 175                        | NR_029671             |
| hpri-125B1-A      | TTCCACCAAATTTCCAGGATGC  |                            |                       |
| hpri-LET7A2-S     | AGACTAACTTGTAATTTCCCTGC | 190                        | NR_029477             |
| hpri-LET7A2-A     | AGGCCTGGAGGAATCATGATC   |                            |                       |
| hpri-LET7A1-S     | TTCTGTGGTGCTCAACTGTG    | 200                        | NR_029476             |
| hpri-LET7A1-A     | TGTACAATTAGTAACTGACTTTC |                            |                       |

**Table S3:**

**List of specific genes extracted from ZAM zone after a transcriptomic analysis**

| <b>log2 FC&lt;2.8</b> | <b>log2 FC&gt;2.8</b> |
|-----------------------|-----------------------|
| A2M                   | ABCC2                 |
| AADAC                 | ABHD11-AS1            |
| ABCA1                 | ADRB2                 |
| ABP1                  | AFF2                  |
| ACVRL1                | AHNAK2                |
| ADA                   | ANK3                  |
| ADAM12                | ANO1-AS2              |
| ADAM19                | AP1S3                 |
| ADAMTS1               | ARHGEF37              |
| ADAMTS4               | ATP12A                |
| ADAMTS5               | AVPR1A                |
| ADAMTS8               | BCKDHB                |
| ADCY1                 | BCL11A                |
| AGT                   | BSPRY                 |
| AKAP12                | BZRAP1                |
| ALDH2                 | C12orf28              |
| AMIGO2                | C14orf34              |
| AMZ1                  | C15orf41              |
| ANKRD1                | C6orf15               |
| ANTXR1                | C7orf41               |
| APOA1                 | C9orf167              |
| APOBEC2               | CAMK1D                |
| APOC1                 | CAMSAP3               |
| APOE                  | CCDC165               |
| AQPEP                 | CCNB3                 |
| AR                    | CDHR4                 |
| ARG1                  | CDK5R1                |
| ASPHD2                | CLDN3                 |
| ASS1                  | CLEC1B                |
| ATP13A4               | CLU                   |
| AXDND1                | CPS1                  |
| BCAR4                 | CSF3                  |
| BCORL1                | CTSC                  |
| BIN2                  | CUBN                  |
| BMP8A                 | CYP21A2               |
| C11orf20              | CYP27C1               |
| C11orf86              | DEFB103B              |
| C12orf42              | DGKB                  |

|          |              |
|----------|--------------|
| C15orf48 | DNAJA4       |
| C1orf115 | DNAJC27-AS1  |
| C1orf130 | DNER         |
| C1QTNF1  | DSG1         |
| C2CD4B   | DST          |
| C2orf72  | DUOXA1       |
| C4BPB    | EMP1         |
| C4orf26  | ENPP5        |
| C5orf46  | EPB41        |
| C7orf58  | EPHA4        |
| C8orf31  | FBXO2        |
| CABLES1  | FBXO41       |
| CACNA1A  | FIGN         |
| CACNA1C  | FLJ25917     |
| CCNO     | FZD1         |
| CD248    | GABBR1       |
| CD302    | GABRB1       |
| CD52     | GABRP        |
| CDA      | GAS6         |
| CDCA7    | GJC2         |
| CDH16    | GSTO2        |
| CDO1     | GUCY1A3      |
| CEACAM1  | HIVEP1       |
| CEACAM3  | HOXA2        |
| CEBPA    | HPN          |
| CFHR3    | ID4          |
| CHST2    | ITPR3        |
| CILP2    | IZUMO2       |
| CKMT2    | KCNJ15       |
| CLDN19   | KCNMA1       |
| CNR1     | KCTD4        |
| COL14A1  | KIAA1244     |
| COL27A1  | KLHDC7B      |
| CORO2A   | KLK5         |
| COTL1    | KLK6         |
| CPE      | KRT27        |
| CPZ      | KRT6B        |
| CSF2RB   | LEP          |
| CSH1     | LGALS7       |
| CSH2     | LGR6         |
| CSHL1    | LINC00239    |
| CSRP2    | LOC100131662 |
| CTAG1A   | LOC100287314 |
| CTNND2   | LOC100505904 |

|            |            |
|------------|------------|
| CTSH       | LOC283070  |
| CTSL1      | LOC340335  |
| CTSL1P8    | LOC645638  |
| CXCL12     | LOC648149  |
| CXCL14     | MBOAT1     |
| CXCR6      | MTL5       |
| CYP11A1    | NCRNA00185 |
| CYP26A1    | NDRG2      |
| CYP4B1     | NOD2       |
| DAB2IP     | NR3C2      |
| DENND2A    | NTRK3      |
| DFNA5      | OCIAD2     |
| DHRS3      | OR2T10     |
| DIO2       | OR2T2      |
| DIRC3      | PDE4D      |
| DISC1      | PGBD3      |
| DLK2       | PLCD1      |
| DLL1       | POU3F3     |
| DLX4       | PP12719    |
| DLX5       | PPP1R13B   |
| DLX6       | PPP2R2B    |
| DNAJC6     | PRPH2      |
| DOCK4      | PTHLH      |
| DPP6       | RASGRF1    |
| DSCR8      | RGS9BP     |
| DZIP1      | RNF222     |
| E2F2       | RSPH1      |
| EBF1       | S100A4     |
| EBI3       | SAA2       |
| ECM2       | SCRN1      |
| EDNRB      | SEMA4D     |
| EEPD1      | SERPINB5   |
| EFHD1      | SERPINB7   |
| EFNB1      | SFN        |
| ELTD1      | SGPP2      |
| ENG        | SLIT2      |
| ENTPD2     | SORD       |
| ENTPD3     | SORT1      |
| ENTPD8     | SOX9       |
| EPHB2      | SPACA4     |
| ERVMER34-1 | SPRR2A     |
| ESAM       | TAS1R3     |
| ESR1       | TMEM159    |
| ESYT3      | TMEM52     |



|          |                |
|----------|----------------|
| EXOC3L4  | TMSB15B        |
| FA2H     | TOB1           |
| FABP7    | TRIM29         |
| FADS1    | TUBB2B         |
| FADS3    | UPK1B          |
| FAM105A  | UPK3B          |
| FAM153A  | WFDC2          |
| FAM153B  | WNT2B          |
| FAM43A   | XLOC_001317    |
| FAM78A   | XLOC_007116    |
| FAM83D   | XLOC_010945    |
| FBLN1    | XLOC_012199    |
| FBXL16   | XLOC_012665    |
| FBXO32   | XLOC_014194    |
| FGF2     | XLOC_12_001947 |
| FGFBP1   | XLOC_12_006079 |
| FGFR2    | XLOC_12_007543 |
| FHOD3    | XLOC_12_010751 |
| FIGNL2   | ZNF474         |
| FILIP1L  |                |
| FLJ13744 |                |
| FLJ16779 |                |
| FLJ30901 |                |
| FLJ31356 |                |
| FLJ43663 |                |
| FLT1     |                |
| FOLR1    |                |
| FOXO1    |                |
| GCM1     |                |
| GDA      |                |
| GDF15    |                |
| GDNF     |                |
| GDPD3    |                |
| GEM      |                |
| GH1      |                |
| GJC1     |                |
| GJD3     |                |
| GKN1     |                |
| GLDC     |                |
| GLIPR1   |                |
| GPLY     |                |
| GPC4     |                |
| GPR116   |                |
| GPR32    |                |

|         |  |
|---------|--|
| GPR78   |  |
| GPX3    |  |
| GRIK2   |  |
| GTSF1   |  |
| GYLTL1B |  |
| HAS3    |  |
| HERC6   |  |
| HES2    |  |
| HEXB    |  |
| HEY1    |  |
| HJURP   |  |
| HMGB3   |  |
| HMGB3P1 |  |
| HMHA1   |  |
| HN1     |  |
| HOXA11  |  |
| HOXA7   |  |
| HPCAL1  |  |
| HPGD    |  |
| HS3ST2  |  |
| HS6ST1  |  |
| HSD3B1  |  |
| HSPA12B |  |
| HTRA4   |  |
| HYAL4   |  |
| ICAM2   |  |
| IGDCC3  |  |
| IGSF23  |  |
| IL13RA2 |  |
| IL15    |  |
| IL17D   |  |
| IL18BP  |  |
| IL18R1  |  |
| IL1RAP  |  |
| IL1RL1  |  |
| IL20RB  |  |
| IL2RB   |  |
| IL33    |  |
| IL6ST   |  |
| INHA    |  |
| INHBA   |  |
| ISM2    |  |
| ITGA1   |  |
| ITGAD   |  |

|              |  |
|--------------|--|
| ITGB3        |  |
| ITLN1        |  |
| ITLN2        |  |
| JAM2         |  |
| JAZF1        |  |
| KAL1         |  |
| KCNA4        |  |
| KCNJ16       |  |
| KCNJ2        |  |
| KCNK12       |  |
| KIAA1324     |  |
| KIF21A       |  |
| KISS1R       |  |
| KITLG        |  |
| KLHL5        |  |
| KLK3         |  |
| KLRC1        |  |
| KLRC4        |  |
| KLRG2        |  |
| KRT37        |  |
| LAIR2        |  |
| LAMB1        |  |
| LAMB4        |  |
| LDLR         |  |
| LGALS14      |  |
| LGSN         |  |
| LIFR         |  |
| LIMS3L       |  |
| LIN28B       |  |
| LINC00162    |  |
| LINC00221    |  |
| LINC00473    |  |
| LINGO2       |  |
| LIPG         |  |
| LITAF        |  |
| LOC100128098 |  |
| LOC100130111 |  |
| LOC100132735 |  |
| LOC100302650 |  |
| LOC100505495 |  |
| LOC100506328 |  |
| LOC100506580 |  |
| LOC100506783 |  |
| LOC100507033 |  |

|              |  |
|--------------|--|
| LOC100507140 |  |
| LOC100507351 |  |
| LOC100507410 |  |
| LOC100507566 |  |
| LOC100507639 |  |
| LOC100509091 |  |
| LOC100509498 |  |
| LOC100652823 |  |
| LOC144817    |  |
| LOC145820    |  |
| LOC219731    |  |
| LOC283404    |  |
| LOC284561    |  |
| LOC339524    |  |
| LOC340340    |  |
| LOC388242    |  |
| LOC388630    |  |
| LOC389634    |  |
| LOC644366    |  |
| LOC644686    |  |
| LOC645722    |  |
| LOC650226    |  |
| LOC729178    |  |
| LOC729680    |  |
| LUM          |  |
| MAGEA8       |  |
| MAPT         |  |
| MARC1        |  |
| MCAM         |  |
| MFAP3L       |  |
| MFSD2A       |  |
| MGAT5B       |  |
| MGP          |  |
| MGST1        |  |
| MIAT         |  |
| MIR205HG     |  |
| MLC1         |  |
| MMP11        |  |
| MMP7         |  |
| MPDZ         |  |
| MYCL1        |  |
| MYO16        |  |
| NAV3         |  |
| NBLA00301    |  |

|          |  |
|----------|--|
| NDC80    |  |
| NFASC    |  |
| NFE2L3   |  |
| NIM1     |  |
| NKD2     |  |
| NKG7     |  |
| NLGN4X   |  |
| NLGN4Y   |  |
| NLRP7    |  |
| NOTUM    |  |
| NRCAM    |  |
| NRIP1    |  |
| NTN1     |  |
| NTN4     |  |
| OGDHL    |  |
| OLR1     |  |
| OOEP     |  |
| OSR2     |  |
| OXGR1    |  |
| PAGE4    |  |
| PALM3    |  |
| PAPLN    |  |
| PAPPA    |  |
| PAPPA2   |  |
| PAPSS2   |  |
| PARD6G   |  |
| PARM1    |  |
| PCDHB10  |  |
| PCDHB9   |  |
| PCOLCE2  |  |
| PDCD1LG2 |  |
| PDE6H    |  |
| PDE8B    |  |
| PDGFRL   |  |
| PDZD2    |  |
| PDZK1IP1 |  |
| PGF      |  |
| PKN1     |  |
| PLA2G7   |  |
| PLA2R1   |  |
| PLAC8    |  |
| PLCE1    |  |
| PLEKHH2  |  |
| PLIN1    |  |

|         |  |
|---------|--|
| PLXDC1  |  |
| PNMAL1  |  |
| PNPLA3  |  |
| POLR1C  |  |
| PPAP2A  |  |
| PPAPDC3 |  |
| PPARG   |  |
| PPP4R4  |  |
| PRB3    |  |
| PRDM1   |  |
| PRG2    |  |
| PRKCE   |  |
| PROK1   |  |
| PROS1   |  |
| PSG1    |  |
| PSG10P  |  |
| PSG2    |  |
| PSG3    |  |
| PSG5    |  |
| PSG6    |  |
| PSG8    |  |
| PTGDS   |  |
| PTGER3  |  |
| PTN     |  |
| PTPN13  |  |
| PVR     |  |
| Q6TXI9  |  |
| RAB15   |  |
| RAB3B   |  |
| RASGRF2 |  |
| RASL11B |  |
| RBM47   |  |
| RBPM5   |  |
| REN     |  |
| REPS2   |  |
| RGN     |  |
| RGPD1   |  |
| RGS16   |  |
| RNF150  |  |
| RRAD    |  |
| S100P   |  |
| SCARB1  |  |
| SCGB1D1 |  |
| SCUBE1  |  |

|             |  |
|-------------|--|
| SCUBE2      |  |
| SEMA5B      |  |
| SERPINB11   |  |
| SERPINB9    |  |
| SFRP1       |  |
| SH3BP4      |  |
| SH3BP5      |  |
| SLC16A6     |  |
| SLC22A18AS  |  |
| SLC25A15    |  |
| SLC44A5     |  |
| SLC4A7      |  |
| SLC6A2      |  |
| SLC6A4      |  |
| SLCO2A1     |  |
| SNAI1       |  |
| SNORD115-1  |  |
| SNORD115-23 |  |
| SNORD115-32 |  |
| SNORD115-4  |  |
| SNX10       |  |
| SOAT1       |  |
| SOD3        |  |
| SOHLH2      |  |
| SORBS1      |  |
| SPATA22     |  |
| SPDYE5      |  |
| SPINK5      |  |
| SPOCD1      |  |
| SPRR2G      |  |
| SRPX        |  |
| SSH2        |  |
| ST3GAL5     |  |
| ST8SIA1     |  |
| STAB2       |  |
| STON1-      |  |
| GTF2A1L     |  |
| STRA6       |  |
| SULF1       |  |
| SULF2       |  |
| SUN3        |  |
| SV2B        |  |
| SYN3        |  |
| SYNPO       |  |

|             |  |
|-------------|--|
| SYNPO2L     |  |
| SYT12       |  |
| TAC3        |  |
| TBC1D4      |  |
| TCF7L1      |  |
| TCF7L2      |  |
| TIMP4       |  |
| TKTL1       |  |
| TLE2        |  |
| TLE6        |  |
| TLR4        |  |
| TM4SF5      |  |
| TMEM108     |  |
| TMEM132B    |  |
| TMEM204     |  |
| TMEM59L     |  |
| TNFAIP2     |  |
| TNFSF10     |  |
| TPRXL       |  |
| TPST1       |  |
| TRH         |  |
| TRIM14      |  |
| TRIM64      |  |
| TSKU        |  |
| TSNARE1     |  |
| TSPAN5      |  |
| TSPAN8      |  |
| TTR         |  |
| UBD         |  |
| UCHL1       |  |
| VAV3        |  |
| VIPR2       |  |
| VIT         |  |
| VWCE        |  |
| WDR86       |  |
| WNK2        |  |
| WNT10B      |  |
| WNT6        |  |
| XAGE3       |  |
| XAGE5       |  |
| XLOC_001595 |  |
| XLOC_003286 |  |
| XLOC_003595 |  |
| XLOC_006705 |  |



|                |  |
|----------------|--|
| XLOC_006781    |  |
| XLOC_007052    |  |
| XLOC_007358    |  |
| XLOC_007370    |  |
| XLOC_007689    |  |
| XLOC_007875    |  |
| XLOC_008696    |  |
| XLOC_010962    |  |
| XLOC_011609    |  |
| XLOC_011645    |  |
| XLOC_012981    |  |
| XLOC_013541    |  |
| XLOC_014351    |  |
| XLOC_12_000384 |  |
| XLOC_12_004317 |  |
| XLOC_12_007986 |  |
| XLOC_12_009139 |  |
| XLOC_12_009292 |  |
| XLOC_12_009441 |  |
| XLOC_12_009811 |  |
| XLOC_12_010056 |  |
| XLOC_12_012745 |  |
| ZFP57          |  |
| ZNF114         |  |

**Table S4:**

**List of jointly hypermethylated genes in ZAM Chorion and over expressed in ZAM Amnion**

AP1S3  
BZRAP1  
CDK5R1  
DNAJA4  
EPB41  
FBXO41  
FIGN  
FZD1  
GABRB1  
GABRP  
GJC2  
LEP  
NDRG2  
NR3C2  
POU3F3  
PPP1R13B  
RNF222  
RSPH1  
SEMA4D  
SERPINB7  
SORD  
SOX9  
TOB1  
TRIM29  
WFDC2  
WNT2B

**Table S5:**

**List of disease mesh-term associated with hypermethylated genes in ZAM Choriodecidua and over expressed in ZAM Amnion**

| MeSH-Term                          | MeSH-Term id(s)                                                                                                                                                                        | p-value  |
|------------------------------------|----------------------------------------------------------------------------------------------------------------------------------------------------------------------------------------|----------|
| Disease Attributes                 | C23.550.291                                                                                                                                                                            | 8,17E-05 |
| Virilism                           | C23.888.971                                                                                                                                                                            | 1,52E-04 |
| Genetic Predisposition to Disease  | C23.550.291.687.500                                                                                                                                                                    | 3,24E-04 |
| Disease Susceptibility             | C23.550.291.687                                                                                                                                                                        | 4,59E-04 |
| Disease Progression                | C23.550.291.656                                                                                                                                                                        | 4,84E-04 |
| Osteoporotic Fractures             | C26.404.545                                                                                                                                                                            | 8,30E-04 |
| Endocrine Gland Neoplasms          | C19.344, C04.588.322                                                                                                                                                                   | 8,85E-04 |
| Gliosis                            | C23.550.369                                                                                                                                                                            | 1,26E-03 |
| Testicular Diseases                | C12.294.829                                                                                                                                                                            | 1,49E-03 |
| alpha-Thalassemia                  | C16.320.070.875.100, C15.378.071.141.150.875.100                                                                                                                                       | 1,50E-03 |
| Pancreatic Neoplasms               | C19.344.421, C06.301.761, C06.689.667, C04.588.274.761, C04.588.322.475                                                                                                                | 1,50E-03 |
| Brain Neoplasms                    | C10.228.140.211, C10.551.240.250, C04.588.614.250.195                                                                                                                                  | 1,50E-03 |
| Anuria                             | C13.351.968.934.070, C13.351.968.419.078, C12.777.419.078, C12.777.934.141                                                                                                             | 1,65E-03 |
| Foot Deformities                   | C05.330                                                                                                                                                                                | 1,76E-03 |
| Lymphatic Metastasis               | C23.550.727.650.560, C04.697.650.560                                                                                                                                                   | 1,78E-03 |
| Pancreatic Diseases                | C06.689                                                                                                                                                                                | 1,91E-03 |
| Skin Neoplasms                     | C17.800.882, C04.588.805                                                                                                                                                               | 1,93E-03 |
| Neoplasms, Germ Cell and Embryonal | C04.557.465                                                                                                                                                                            | 2,06E-03 |
| Hyperandrogenism                   | C16.131.939.316.129.750, C12.706.316.064.500, C13.351.875.253.064.500, C19.391.119.129.750, C13.351.875.253.129.750, C16.131.939.316.064.500, C19.391.119.064.500, C12.706.316.129.750 | 2,14E-03 |
| Dementia                           | C10.228.140.380                                                                                                                                                                        | 2,16E-03 |
| Kwashiorkor                        | C18.654.521.500.708.626.505                                                                                                                                                            | 2,30E-03 |
| Neurofibroma                       | C04.557.580.600.580                                                                                                                                                                    | 2,37E-03 |
| Cryptorchidism                     | C12.294.829.258, C16.131.939.258, C19.391.829.258, C12.706.258                                                                                                                         | 2,46E-03 |
| Genital Neoplasms, Male            | C12.758.409, C04.588.945.440, C12.294.260                                                                                                                                              | 2,55E-03 |
| Nerve Sheath Neoplasms             | C04.557.580.600                                                                                                                                                                        | 2,62E-03 |
| Central Nervous System Neoplasms   | C04.588.614.250, C10.551.240                                                                                                                                                           | 2,68E-03 |
| Cardio-Renal Syndrome              | C13.351.968.419.780.400, C14.280.434.156, C12.777.419.780.400                                                                                                                          | 2,75E-03 |
| Sarcoma                            | C04.557.450.795                                                                                                                                                                        | 3,32E-03 |
| Urogenital Abnormalities           | C16.131.939                                                                                                                                                                            | 3,38E-03 |
| Nervous System Neoplasms           | C10.551                                                                                                                                                                                | 3,39E-03 |
| Nervous System Neoplasms           | C04.588.614                                                                                                                                                                            | 3,42E-03 |
| Autoimmune Diseases                | C20.111                                                                                                                                                                                | 3,44E-03 |
| Urogenital Abnormalities           | C12.706                                                                                                                                                                                | 3,45E-03 |
| Mandibular Fractures               | C26.404.750.467.441, C26.260.275.500.400.255                                                                                                                                           | 3,46E-03 |
| Mandibular Diseases                | C05.500.607                                                                                                                                                                            | 3,62E-03 |
| Uremia                             | C13.351.968.419.936, C12.777.419.936                                                                                                                                                   | 3,92E-03 |
| Jaw Fractures                      | C26.404.750.467, C26.260.275.500.400                                                                                                                                                   | 4,01E-03 |

|                                                 |                                                                                            |          |
|-------------------------------------------------|--------------------------------------------------------------------------------------------|----------|
| Brain Infarction                                | C14.907.253.855.200, C10.228.140.300.775.200, C10.228.140.300.150.477, C14.907.253.092.477 | 4,03E-03 |
| Female Athlete Triad Syndrome                   | C05.116.198.579.304, C19.391.240                                                           | 4,11E-03 |
| Mandibular Diseases                             | C07.320.610                                                                                | 4,14E-03 |
| Neoplasm Metastasis                             | C23.550.727.650, C04.697.650                                                               | 4,35E-03 |
| Prostatic Neoplasms                             | C12.758.409.750, C12.294.260.750, C04.588.945.440.770, C12.294.565.625                     | 4,49E-03 |
| Brain Diseases                                  | C10.228.140                                                                                | 4,55E-03 |
| Sertoli Cell-Only Syndrome                      | C12.294.365.700.754                                                                        | 4,60E-03 |
| Pathologic Processes                            | C23.550                                                                                    | 4,63E-03 |
| Osteophyte                                      | C05.116.540.310.800                                                                        | 4,72E-03 |
| Temporomandibular Joint Disorders               | C05.500.607.221.897, C07.320.610.291.897, C05.550.905, C05.651.243.897, C07.678            | 4,75E-03 |
| Pleural Effusion                                | C08.528.652                                                                                | 4,76E-03 |
| Adrenocortical Adenoma                          | C19.344.078.265.500, C19.053.347.500.500, C19.053.098.265.500, C04.588.322.078.265.500     | 4,80E-03 |
| Pseudohypoaldosteronism                         | C16.320.565.861.770, C13.351.968.419.815.770, C12.777.419.815.770, C18.452.648.861.770     | 4,84E-03 |
| Premenstrual Syndrome                           | C23.550.568.968                                                                            | 4,84E-03 |
| 46, XX Disorders of Sex Development             | C12.706.316.064, C19.391.119.064, C13.351.875.253.064, C16.131.939.316.064                 | 4,85E-03 |
| Cranio-mandibular Disorders                     | C05.500.607.221, C07.320.610.291, C05.651.243                                              | 4,96E-03 |
| Osteoporosis                                    | C05.116.198.579                                                                            | 5,04E-03 |
| Prostatic Diseases                              | C12.294.565                                                                                | 5,29E-03 |
| alpha-Thalassemia                               | C16.320.365.826.100, C15.378.420.826.100                                                   | 5,29E-03 |
| Neurodegenerative Diseases                      | C10.574                                                                                    | 5,32E-03 |
| Tracheomalacia                                  | C17.300.182.895.500, C16.131.621.953.500, C08.907.796.500, C05.182.895.500                 | 5,48E-03 |
| Tracheobronchomalacia                           | C08.907.796                                                                                | 5,48E-03 |
| Anhedonia                                       | C23.888.592.604.039, C10.597.606.057                                                       | 5,61E-03 |
| Heart Septal Defects, Ventricular               | C16.131.240.400.560.540, C14.280.400.560.540, C14.240.400.560.540                          | 5,87E-03 |
| Neurilemmoma                                    | C04.557.580.625.650.595                                                                    | 6,08E-03 |
| Genital Diseases, Male                          | C12.294                                                                                    | 6,11E-03 |
| Infertility, Male                               | C12.294.365.700                                                                            | 6,15E-03 |
| Pseudotumor Cerebri                             | C10.228.140.631.750                                                                        | 6,16E-03 |
| Endocrine System Diseases                       | C19                                                                                        | 6,43E-03 |
| Brain Ischemia                                  | C14.907.253.092, C10.228.140.300.150                                                       | 6,44E-03 |
| Tooth Diseases                                  | C07.793                                                                                    | 6,50E-03 |
| Respiratory Tract Diseases                      | C08                                                                                        | 6,65E-03 |
| Cholestasis                                     | C06.130.120.135                                                                            | 6,80E-03 |
| Kidney Failure, Chronic                         | C13.351.968.419.780.750.500, C12.777.419.780.750.500                                       | 6,82E-03 |
| Tracheobronchomalacia                           | C16.131.621.953, C17.300.182.895, C05.182.895                                              | 6,84E-03 |
| Urinary Tract Infections                        | C01.539.895, C13.351.968.892, C12.777.892                                                  | 6,85E-03 |
| Maxillofacial Injuries                          | C26.260.275.500                                                                            | 7,02E-03 |
| Autoimmune Diseases of the Nervous System       | C20.111.258, C10.114                                                                       | 7,16E-03 |
| Encephalomyelitis, Autoimmune, Experimental     | C20.111.258.625.300, C10.114.703.300, C10.314.350.250, C10.228.140.695.562.250             | 7,19E-03 |
| Immune System Diseases                          | C20                                                                                        | 7,22E-03 |
| Ossification of Posterior Longitudinal Ligament | C05.116.900.480, C23.550.751.500                                                           | 7,31E-03 |
| Cerebrovascular Disorders                       | C10.228.140.300, C14.907.253                                                               | 7,69E-03 |
| Osteochondritis                                 | C17.300.182.520, C05.182.520                                                               | 7,77E-03 |
| Chondrosarcoma                                  | C04.557.450.795.300, C04.557.450.565.280                                                   | 7,78E-03 |

|                                                 |                                                  |          |
|-------------------------------------------------|--------------------------------------------------|----------|
| Pelvic Inflammatory Disease                     | C01.539.635.500                                  | 8,08E-03 |
| Neurilemmoma                                    | C04.557.580.600.610.595, C04.557.465.625.650.595 | 8,20E-03 |
| Refeeding Syndrome                              | C18.654.521.687                                  | 8,21E-03 |
| Acanthosis Nigricans                            | C17.800.621.430.530.100                          | 8,24E-03 |
| Urogenital Neoplasms                            | C12.758                                          | 8,25E-03 |
| Carcinoma, Basal Cell                           | C04.557.470.565.165, C04.557.470.200.165         | 8,36E-03 |
| Nephritis, Interstitial                         | C12.777.419.570.643, C13.351.968.419.570.643     | 8,50E-03 |
| Nervous System Autoimmune Disease, Experimental | C10.114.703, C20.111.258.625                     | 8,55E-03 |
| Teratocarcinoma                                 | C04.557.465.900                                  | 8,59E-03 |
| Hyperphosphatemia                               | C18.452.750.199                                  | 8,72E-03 |
| Pelvic Infection                                | C01.539.635                                      | 8,72E-03 |
| Pleural Diseases                                | C08.528                                          | 8,98E-03 |
| Demyelinating Autoimmune Diseases, CNS          | C10.228.140.695.562                              | 9,11E-03 |
| Neuroendocrine Tumors                           | C04.557.580.625.650                              | 9,17E-03 |
| Central Nervous System Diseases                 | C10.228                                          | 9,19E-03 |
| Hereditary Autoinflammatory Diseases            | C17.800.827.368                                  | 9,39E-03 |
| Neuroendocrine Tumors                           | C04.557.465.625.650                              | 9,42E-03 |
| Heart Failure, Systolic                         | C14.280.434.676                                  | 9,56E-03 |
| TDP-43 Proteinopathies                          | C10.574.950, C18.452.845.800                     | 9,75E-03 |
| Demyelinating Autoimmune Diseases, CNS          | C10.314.350                                      | 9,83E-03 |
| Carcinogenesis                                  | C04.697.098, C23.550.727.098                     | 9,88E-03 |
| Chromosome Inversion                            | C23.550.210.190                                  | 9,88E-03 |
| Esophageal and Gastric Varices                  | C06.552.494.414, C06.405.117.240                 | 9,90E-03 |
| Protozoan Infections, Animal                    | C03.752.625, C03.701.688, C22.674.710            | 9,94E-03 |

**Table S6:**

**List of jointly hypermethylated genes in ZAM Amnion and over expressed in ZAM Choriondecidua**

|          |          |           |
|----------|----------|-----------|
| ADAMTS1  | HPCAL1   | OOEP      |
| ADAMTS5  | HPGD     | PAGE4     |
| ANTXR1   | HSD3B1   | PAPPA2    |
| APOA1    | ICAM2    | PAPSS2    |
| AR       | IL15     | PARD6G    |
| ATP13A4  | IL1RL1   | PDCD1LG2  |
| BIN2     | IL20RB   | PLEKHH2   |
| C1orf130 | ISM2     | PPAP2A    |
| C1QTNF1  | ITGA1    | PPAPDC3   |
| C2CD4B   | JAM2     | PPARG     |
| C7orf58  | JAZF1    | PPP4R4    |
| CDA      | KCNJ16   | PRB3      |
| CEACAM3  | KIAA1324 | PRG2      |
| COL14A1  | KITLG    | PROK1     |
| CORO2A   | KLK3     | PTGER3    |
| CXCR6    | LAIR2    | SCARB1    |
| CYP11A1  | LGALS14  | SERPINB11 |
| DENND2A  | LIFR     | SLC44A5   |
| DIO2     | LINGO2   | SLC6A2    |
| DSCR8    | LIPG     | SOAT1     |
| EEPDI    | MAGEA8   | SOHLH2    |
| ENTPD8   | MAPT     | SSH2      |
| FAM153B  | MCAM     | STAB2     |
| FHOD3    | MFSD2A   | SV2B      |
| FIGNL2   | MMP11    | TLR4      |
| FLJ43663 | MMP7     | TM4SF5    |
| GCM1     | NFASC    | TMEM132B  |
| GDF15    | NFE2L3   | TNFSF10   |
| GH1      | NKD2     | TPST1     |
| GKN1     | NKG7     | TRIM14    |
| GPC4     | NLGN4X   | TSKU      |
| GTSF1    | NLRP7    | TSNARE1   |
| GYLTL1B  | OGDHL    | TSPAN8    |
| HMGB3    | OLR1     | VAV3      |
| HN1      |          | XAGE3     |
|          |          | ZFP57     |

**Table S7:**

**List of disease mesh-term associated with hypermethylated genes in ZAM Amnion and over expressed in ZAM Choriondecidua**

| MeSH-Term                           | MeSH-Term id(s)                                                                            | p-value  |
|-------------------------------------|--------------------------------------------------------------------------------------------|----------|
| Gestational Trophoblastic Disease   | C04.557.465.955.416, C04.850.908.416, C13.703.720.949.416                                  | 1,92E-08 |
| Trophoblastic Neoplasms             | C04.850.908, C13.703.720.949                                                               | 2,33E-08 |
| Trophoblastic Neoplasms             | C04.557.465.955                                                                            | 2,35E-08 |
| Rheumatoid Nodule                   | C17.300.775.099.683, C05.799.114.683, C05.550.114.154.683                                  | 4,13E-08 |
| Pregnancy Complications, Neoplastic | C04.850, C13.703.720                                                                       | 5,56E-08 |
| Hydatidiform Mole                   | C13.703.720.949.416.875, C04.557.465.955.416.812, C04.850.908.416.750                      | 1,73E-07 |
| Choriocarcinoma                     | C04.557.465.955.416.202, C13.703.720.949.416.218, C04.850.908.416.186                      | 1,17E-06 |
| Choriocarcinoma                     | C04.557.470.200.025.455, C04.557.465.955.207                                               | 1,19E-06 |
| Communicable Diseases               | C01.539.221                                                                                | 1,92E-06 |
| Pre-Eclampsia                       | C13.703.395.249                                                                            | 6,78E-06 |
| Pregnancy, Ectopic                  | C13.703.733                                                                                | 9,04E-06 |
| Hypertension, Pregnancy-Induced     | C13.703.395                                                                                | 9,34E-06 |
| Metaplasia                          | C23.550.589                                                                                | 9,39E-06 |
| Melanoma, Experimental              | C04.557.465.625.650.510.525, C04.619.600, C04.557.580.625.650.510.525, C04.557.665.510.525 | 9,57E-06 |
| Hypersensitivity, Delayed           | C20.543.418                                                                                | 1,09E-05 |
| Uveitis                             | C11.941.879                                                                                | 1,68E-05 |
| Neovascularization, Pathologic      | C23.550.589.500                                                                            | 2,39E-05 |
| Rheumatic Diseases                  | C05.799                                                                                    | 2,61E-05 |
| Placenta Diseases                   | C13.703.590                                                                                | 3,04E-05 |
| Tendon Injuries                     | C26.874                                                                                    | 4,43E-05 |
| Osteoarthritis, Knee                | C05.799.613.500, C05.550.114.606.500                                                       | 6,64E-05 |
| Hepatitis, Autoimmune               | C06.552.380.350.050, C20.111.567                                                           | 6,98E-05 |
| Dermatitis, Contact                 | C17.800.815.255, C17.800.174.255                                                           | 7,84E-05 |
| Infertility                         | C13.351.500.365                                                                            | 9,15E-05 |
| Fetal Growth Retardation            | C23.550.393.450, C13.703.277.370, C16.300.390                                              | 9,71E-05 |
| Uveitis, Anterior                   | C11.941.879.780.880                                                                        | 1,26E-04 |
| Sarcoidosis, Pulmonary              | C15.604.515.827.725, C08.381.483.725                                                       | 1,28E-04 |
| Infertility, Female                 | C13.351.500.365.700                                                                        | 1,34E-04 |
| Leukemia-Lymphoma, Adult T-Cell     | C15.604.515.560.575.100, C04.557.337.428.580.100, C20.683.515.528.582.100                  | 1,34E-04 |
| Pregnancy Complications             | C13.703                                                                                    | 1,46E-04 |
| Rhinitis                            | C08.730.674                                                                                | 1,56E-04 |
| Joint Diseases                      | C05.550                                                                                    | 1,60E-04 |
| Tuberculosis, Pleural               | C08.730.912, C08.528.928, C01.252.410.040.552.846.877                                      | 1,66E-04 |
| Lichen Planus                       | C17.800.859.475.560                                                                        | 1,68E-04 |
| Panuveitis                          | C11.941.879.780                                                                            | 1,86E-04 |
| Sarcoidosis                         | C15.604.515.827                                                                            | 1,89E-04 |
| Neoplasms, Germ Cell and Embryonal  | C04.557.465                                                                                | 2,01E-04 |
| Brain Neoplasms                     | C04.588.614.250.195, C10.228.140.211, C10.551.240.250                                      | 2,05E-04 |
| Dermatitis, Allergic Contact        | C17.800.815.255.100, C17.800.174.255.100, C20.543.418.150                                  | 2,21E-04 |
| Myocarditis                         | C14.280.238.625                                                                            | 2,49E-04 |
| Leukemia, T-Cell                    | C04.557.337.428.580, C20.683.515.528.582, C15.604.515.560.575                              | 2,52E-04 |
| Alveolar Bone Loss                  | C07.465.714.354.500, C05.116.264.150                                                       | 2,56E-04 |
| Otitis Media with Effusion          | C09.218.705.663.683                                                                        | 2,74E-04 |
| Encephalitis, Viral                 | C10.228.228.210.150.300, C10.228.228.245.340, C02.182.500.300, C02.290                     | 2,92E-04 |
| Granuloma                           | C15.604.515.292                                                                            | 2,94E-04 |

|                                         |                                                                                                                                                                |          |
|-----------------------------------------|----------------------------------------------------------------------------------------------------------------------------------------------------------------|----------|
| Arteritis                               | C14.907.184, C14.907.940.090                                                                                                                                   | 2,98E-04 |
| Temporomandibular Joint Disorders       | C05.550.905, C05.500.607.221.897, C07.678, C07.320.610.291.897, C05.651.243.897                                                                                | 3,01E-04 |
| Cranio-mandibular Disorders             | C05.500.607.221, C07.320.610.291, C05.651.243                                                                                                                  | 3,19E-04 |
| Skin Diseases, Vascular                 | C17.800.862                                                                                                                                                    | 3,30E-04 |
| Lichenoid Eruptions                     | C17.800.859.475                                                                                                                                                | 3,36E-04 |
| Colitis                                 | C06.405.205.265, C06.405.469.158.188                                                                                                                           | 3,45E-04 |
| Carcinoma, Merkel Cell                  | C04.925.216, C02.928.216, C04.557.465.625.650.240.325, C02.256.721.150, C04.557.580.625.650.240.325, C04.557.470.200.025.370.325                               | 3,49E-04 |
| Pleurisy                                | C08.730.582, C08.528.735                                                                                                                                       | 3,49E-04 |
| Hemostatic Disorders                    | C14.907.454                                                                                                                                                    | 3,54E-04 |
| Giant Cell Arteritis                    | C14.907.940.090.530, C10.228.140.300.850.500, C14.907.184.438, C14.907.940.907.700, C10.114.875.700, C17.800.862.252, C14.907.253.946.700, C20.111.258.962.800 | 3,59E-04 |
| Arthritis, Rheumatoid                   | C20.111.199                                                                                                                                                    | 3,60E-04 |
| Arthritis, Rheumatoid                   | C17.300.775.099, C05.799.114, C05.550.114.154                                                                                                                  | 3,61E-04 |
| Liposarcoma                             | C04.557.450.795.465, C04.557.450.550.420                                                                                                                       | 3,66E-04 |
| Arthritis                               | C05.550.114                                                                                                                                                    | 3,75E-04 |
| Shock, Hemorrhagic                      | C23.550.835.650, C23.550.414.980                                                                                                                               | 3,80E-04 |
| Demyelinating Autoimmune Diseases, CNS  | C10.314.350                                                                                                                                                    | 3,87E-04 |
| Central Nervous System Neoplasms        | C04.588.614.250, C10.551.240                                                                                                                                   | 4,01E-04 |
| Hemostatic Disorders                    | C15.378.463.515                                                                                                                                                | 4,17E-04 |
| Female Urogenital Diseases              | C13.351                                                                                                                                                        | 4,35E-04 |
| Neoplasms, Glandular and Epithelial     | C04.557.470                                                                                                                                                    | 4,40E-04 |
| Respiration Disorders                   | C08.618                                                                                                                                                        | 4,49E-04 |
| Encephalitozoonosis                     | C01.703.617.300                                                                                                                                                | 4,90E-04 |
| Pituitary Neoplasms                     | C04.588.614.250.195.885.500.600, C10.551.240.250.700.500.500, C10.228.140.211.885.500.600, C10.228.140.617.477.600                                             | 4,97E-04 |
| Scleroderma, Systemic                   | C17.800.784, C17.300.799                                                                                                                                       | 4,97E-04 |
| Multiple Sclerosis, Relapsing-Remitting | C20.111.258.250.500.600, C10.114.375.500.600, C10.314.350.500.600                                                                                              | 4,99E-04 |
| Arbovirus Infections                    | C02.081                                                                                                                                                        | 5,02E-04 |
| Hemorrhagic Disorders                   | C15.378.463                                                                                                                                                    | 5,15E-04 |
| Nervous System Neoplasms                | C10.551                                                                                                                                                        | 5,26E-04 |
| Multiple Sclerosis                      | C20.111.258.250.500, C10.114.375.500, C10.314.350.500                                                                                                          | 5,26E-04 |
| Nervous System Neoplasms                | C04.588.614                                                                                                                                                    | 5,32E-04 |
| Rheumatic Diseases                      | C17.300.775                                                                                                                                                    | 5,33E-04 |
| Hypothalamic Neoplasms                  | C10.228.140.211.885.500, C04.588.614.250.195.885.500, C10.228.140.617.477, C10.551.240.250.700.500                                                             | 5,35E-04 |
| Plaque, Atherosclerotic                 | C23.300.823                                                                                                                                                    | 5,43E-04 |
| Conjunctivitis                          | C11.187.183                                                                                                                                                    | 5,54E-04 |
| Cardiomyopathy, Dilated                 | C14.280.238.070, C14.280.195.160                                                                                                                               | 5,55E-04 |
| Periodontal Atrophy                     | C07.465.714.354                                                                                                                                                | 5,78E-04 |
| Lichen Planus, Oral                     | C07.465.397, C17.800.859.475.560.397                                                                                                                           | 5,90E-04 |
| Bone Resorption                         | C05.116.264                                                                                                                                                    | 5,91E-04 |
| Demyelinating Autoimmune Diseases, CNS  | C10.114.375, C20.111.258.250                                                                                                                                   | 6,38E-04 |
| Rotavirus Infections                    | C02.782.791.814                                                                                                                                                | 6,51E-04 |
| Pituitary Neoplasms                     | C19.344.609, C19.700.734, C10.228.140.617.738.675, C04.588.322.609                                                                                             | 6,70E-04 |
| Supratentorial Neoplasms                | C04.588.614.250.195.885, C10.228.140.211.885, C10.551.240.250.700                                                                                              | 6,73E-04 |
| Acute Coronary Syndrome                 | C14.280.647.124, C23.888.646.215.500.074, C14.907.585.187.074, C14.907.585.124, C14.280.647.187.074                                                            | 6,77E-04 |
| Thymus Neoplasms                        | C15.604.861, C04.588.894.949                                                                                                                                   | 6,78E-04 |
| Collagen Diseases                       | C17.300.200                                                                                                                                                    | 7,04E-04 |



|                                                 |                                                                                                                                                                                                 |          |
|-------------------------------------------------|-------------------------------------------------------------------------------------------------------------------------------------------------------------------------------------------------|----------|
| Hypertension                                    | C14.907.489                                                                                                                                                                                     | 7,12E-04 |
| Polymyositis                                    | C05.651.594.819, C10.668.491.562.575                                                                                                                                                            | 7,17E-04 |
| Crohn Disease                                   | C06.405.469.432.500, C06.405.205.731.500                                                                                                                                                        | 7,24E-04 |
| Dysentery                                       | C06.405.205.331, C06.405.469.300                                                                                                                                                                | 7,34E-04 |
| Adenoma                                         | C04.557.470.035                                                                                                                                                                                 | 7,43E-04 |
| Bacteroidaceae Infections                       | C01.252.400.110                                                                                                                                                                                 | 7,43E-04 |
| Aspergillosis, Allergic Bronchopulmonary        | C17.800.838.208.416.249.074, C01.703.295.328.249.074, C08.674.060, C20.543.480.680.085, C08.730.435.090, C01.703.534.090, C01.539.800.200.383.249.074, C08.381.472.850.500, C01.703.513.249.074 | 7,50E-04 |
| Onchocerciasis, Ocular                          | C03.300.562, C03.335.508.700.750.361.699.500, C11.294.725.562                                                                                                                                   | 7,55E-04 |
| Eosinophilia                                    | C15.378.553.231                                                                                                                                                                                 | 7,66E-04 |
| Hypertrophy, Left Ventricular                   | C14.280.195.400, C23.300.775.250.400                                                                                                                                                            | 7,85E-04 |
| Genital Neoplasms, Female                       | C13.351.937.418                                                                                                                                                                                 | 7,96E-04 |
| Mucopolysaccharidosis VI                        | C18.452.648.595.600.670, C16.320.565.202.715.670, C18.452.648.202.715.670, C17.300.550.575.670                                                                                                  | 8,05E-04 |
| Esophageal Neoplasms                            | C06.405.249.205, C04.588.443.353, C06.301.371.205, C06.405.117.430, C04.588.274.476.205                                                                                                         | 9,12E-04 |
| Genital Diseases, Female                        | C13.351.500                                                                                                                                                                                     | 9,88E-04 |
| Hepatitis, Chronic                              | C06.552.380.350                                                                                                                                                                                 | 1,00E-03 |
| Prolactinoma                                    | C10.228.140.617.738.675.800, C04.557.470.035.625, C19.700.734.792, C19.344.609.792, C04.588.322.609.792                                                                                         | 1,01E-03 |
| Rupture                                         | C26.761                                                                                                                                                                                         | 1,02E-03 |
| Encephalitis                                    | C02.182.500, C10.228.228.210.150                                                                                                                                                                | 1,02E-03 |
| Thyroid Diseases                                | C19.874                                                                                                                                                                                         | 1,02E-03 |
| Sinusitis                                       | C09.603.692.752, C08.730.749, C08.460.692.752                                                                                                                                                   | 1,03E-03 |
| Uterine Neoplasms                               | C13.351.500.852.762                                                                                                                                                                             | 1,05E-03 |
| Shock, Traumatic                                | C26.797                                                                                                                                                                                         | 1,07E-03 |
| Mastocytoma                                     | C04.557.450.565.465.249, C17.800.508.236                                                                                                                                                        | 1,07E-03 |
| Uveal Diseases                                  | C11.941                                                                                                                                                                                         | 1,08E-03 |
| Vasculitis, Central Nervous System              | C20.111.258.962                                                                                                                                                                                 | 1,09E-03 |
| Encephalomyelitis, Autoimmune, Experimental     | C20.111.258.625.300, C10.314.350.250, C10.228.140.695.562.250, C10.114.703.300                                                                                                                  | 1,10E-03 |
| Slow Virus Diseases                             | C02.839                                                                                                                                                                                         | 1,10E-03 |
| Vasculitis, Central Nervous System              | C14.907.253.946, C10.228.140.300.850, C10.114.875, C14.907.940.907                                                                                                                              | 1,14E-03 |
| Spondylarthritis                                | C05.116.900.853.625, C05.550.114.865                                                                                                                                                            | 1,15E-03 |
| Uterine Neoplasms                               | C04.588.945.418.948                                                                                                                                                                             | 1,16E-03 |
| Uterine Neoplasms                               | C13.351.937.418.875                                                                                                                                                                             | 1,18E-03 |
| Venous Thrombosis                               | C14.907.355.830.925                                                                                                                                                                             | 1,18E-03 |
| Connective Tissue Diseases                      | C17.300                                                                                                                                                                                         | 1,19E-03 |
| Corneal Neovascularization                      | C11.204.290                                                                                                                                                                                     | 1,21E-03 |
| Glomerulonephritis, IGA                         | C20.111.525, C12.777.419.570.363.608, C13.351.968.419.570.363.608                                                                                                                               | 1,22E-03 |
| Cysticercosis                                   | C03.335.190.902.185                                                                                                                                                                             | 1,28E-03 |
| Anoxia                                          | C23.888.852.079                                                                                                                                                                                 | 1,29E-03 |
| Digestive System Abnormalities                  | C06.198                                                                                                                                                                                         | 1,30E-03 |
| Autoimmune Diseases of the Nervous System       | C20.111.258, C10.114                                                                                                                                                                            | 1,30E-03 |
| Nematode Infections                             | C03.335.508                                                                                                                                                                                     | 1,31E-03 |
| Acquired Immunodeficiency Syndrome              | C20.673.480.040, C02.839.040, C02.782.815.616.400.040, C02.800.801.400.040                                                                                                                      | 1,33E-03 |
| Spondylitis                                     | C05.116.900.853                                                                                                                                                                                 | 1,33E-03 |
| Ascites                                         | C23.550.081                                                                                                                                                                                     | 1,34E-03 |
| Eye Infections                                  | C11.294                                                                                                                                                                                         | 1,35E-03 |
| Nervous System Autoimmune Disease, Experimental | C10.114.703, C20.111.258.625                                                                                                                                                                    | 1,37E-03 |

|                                                        |                                                                                     |          |
|--------------------------------------------------------|-------------------------------------------------------------------------------------|----------|
| Bone Marrow Neoplasms                                  | C15.378.400.200, C04.588.448.200, C15.378.190.250                                   | 1,38E-03 |
| Encephalitis                                           | C10.228.228.245                                                                     | 1,39E-03 |
| Osteoarthritis, Hip                                    | C05.799.613.400, C05.550.114.606.400                                                | 1,39E-03 |
| Paracoccidioidomycosis                                 | C01.703.700, C17.800.838.208.600, C01.703.295.600, C01.539.800.200.600              | 1,40E-03 |
| Demyelinating Diseases                                 | C10.314                                                                             | 1,43E-03 |
| Growth Disorders                                       | C23.550.393                                                                         | 1,43E-03 |
| Spinal Diseases                                        | C05.116.900                                                                         | 1,43E-03 |
| Keratitis                                              | C11.204.564                                                                         | 1,45E-03 |
| Demyelinating Autoimmune Diseases, CNS                 | C10.228.140.695.562                                                                 | 1,48E-03 |
| Suppuration                                            | C01.539.830                                                                         | 1,48E-03 |
| Uterine Diseases                                       | C13.351.500.852                                                                     | 1,49E-03 |
| Genital Neoplasms, Female                              | C04.588.945.418                                                                     | 1,50E-03 |
| Cicatrix                                               | C23.550.355.274                                                                     | 1,54E-03 |
| Female Urogenital Diseases and Pregnancy Complications | C13                                                                                 | 1,54E-03 |
| Melanoma                                               | C04.557.465.625.650.510, C04.557.580.625.650.510, C04.557.665.510                   | 1,54E-03 |
| Bronchitis                                             | C08.127.446, C08.381.495.146                                                        | 1,54E-03 |
| Nevi and Melanomas                                     | C04.557.665                                                                         | 1,72E-03 |
| Ehrlichiosis                                           | C01.252.400.825.200                                                                 | 1,73E-03 |
| Neuroendocrine Tumors                                  | C04.557.580.625.650                                                                 | 1,74E-03 |
| Nasal Polyps                                           | C09.603.557, C08.460.572, C23.300.825.557                                           | 1,75E-03 |
| Gastroenteritis                                        | C06.405.205                                                                         | 1,77E-03 |
| Sarcopenia                                             | C10.597.613.612.500, C23.888.592.608.612.500, C23.300.070.500.500                   | 1,78E-03 |
| Neuroendocrine Tumors                                  | C04.557.465.625.650                                                                 | 1,79E-03 |
| Abdominal Neoplasms                                    | C04.588.033                                                                         | 1,81E-03 |
| Wallerian Degeneration                                 | C23.550.737.750                                                                     | 1,85E-03 |
| Flavivirus Infections                                  | C02.782.350.250                                                                     | 1,87E-03 |
| Endometrial Neoplasms                                  | C13.351.500.852.762.200                                                             | 1,88E-03 |
| Dermatitis                                             | C17.800.174                                                                         | 1,91E-03 |
| Rhinitis                                               | C08.460.799, C09.603.799                                                            | 1,92E-03 |
| Neoplasms, Adipose Tissue                              | C04.557.450.550                                                                     | 1,93E-03 |
| Ehrlichiosis                                           | C01.252.400.054.160                                                                 | 1,98E-03 |
| Liver Cirrhosis, Biliary                               | C06.552.630.400, C06.552.150.250, C06.130.120.135.250.250                           | 1,99E-03 |
| Shock                                                  | C23.550.835                                                                         | 2,00E-03 |
| Neoplasms, Connective and Soft Tissue                  | C04.557.450                                                                         | 2,02E-03 |
| Microsporidiosis                                       | C01.703.617                                                                         | 2,04E-03 |
| Barrett Esophagus                                      | C06.405.117.102, C06.198.102                                                        | 2,10E-03 |
| Musculoskeletal Diseases                               | C05                                                                                 | 2,11E-03 |
| Hypereosinophilic Syndrome                             | C15.378.553.231.549                                                                 | 2,12E-03 |
| Sarcoma                                                | C04.557.450.795                                                                     | 2,15E-03 |
| Corneal Diseases                                       | C11.204                                                                             | 2,15E-03 |
| Cardiomegaly                                           | C14.280.195                                                                         | 2,16E-03 |
| Tendinopathy                                           | C26.874.800                                                                         | 2,16E-03 |
| Biliary Tract Diseases                                 | C06.130                                                                             | 2,19E-03 |
| Brain Abscess                                          | C01.323, C01.539.830.025.160, C10.228.140.116, C10.228.228.090                      | 2,19E-03 |
| Eye Infections                                         | C01.539.375                                                                         | 2,22E-03 |
| AIDS-Related Opportunistic Infections                  | C20.673.480.100, C01.539.597.050, C03.684.050, C02.597.050, C02.782.815.616.400.100 | 2,22E-03 |
| Reoviridae Infections                                  | C02.782.791                                                                         | 2,25E-03 |
| Periodontal Diseases                                   | C07.465.714                                                                         | 2,27E-03 |
| Urogenital Neoplasms                                   | C13.351.937                                                                         | 2,29E-03 |
| Pulmonary Aspergillosis                                | C08.381.472.850                                                                     | 2,29E-03 |

|                                     |                                                                                                                                         |          |
|-------------------------------------|-----------------------------------------------------------------------------------------------------------------------------------------|----------|
| Herpes Genitalis                    | C13.351.500.342, C02.800.801.350, C12.294.329, C02.256.466.382.290                                                                      | 2,32E-03 |
| Prosthesis Failure                  | C23.550.767.865                                                                                                                         | 2,33E-03 |
| Cardiomegaly                        | C23.300.775.250                                                                                                                         | 2,36E-03 |
| Epiretinal Membrane                 | C11.768.328                                                                                                                             | 2,39E-03 |
| Osteoarthritis                      | C05.799.613, C05.550.114.606                                                                                                            | 2,43E-03 |
| Adenocarcinoma                      | C04.557.470.200.025                                                                                                                     | 2,45E-03 |
| Bronchial Hyperreactivity           | C08.127.210                                                                                                                             | 2,48E-03 |
| Endometrial Neoplasms               | C04.588.945.418.948.585                                                                                                                 | 2,50E-03 |
| Pituitary Diseases                  | C10.228.140.617.738                                                                                                                     | 2,51E-03 |
| Leishmaniasis, Diffuse Cutaneous    | C03.858.560.400.350, C17.800.838.775.560.400.350, C03.752.300.500.400.350                                                               | 2,54E-03 |
| Taeniasis                           | C03.335.190.902                                                                                                                         | 2,56E-03 |
| Xanthomatosis                       | C18.452.584.750                                                                                                                         | 2,56E-03 |
| Abdominal Pain                      | C23.888.646.100, C23.888.821.030                                                                                                        | 2,57E-03 |
| Rhabdoviridae Infections            | C02.782.580.830                                                                                                                         | 2,59E-03 |
| Endometrial Neoplasms               | C13.351.937.418.875.200                                                                                                                 | 2,60E-03 |
| Neoplasm Metastasis                 | C23.550.727.650, C04.697.650                                                                                                            | 2,61E-03 |
| Dry Eye Syndromes                   | C11.496.260                                                                                                                             | 2,61E-03 |
| Disease Resistance                  | C23.550.291.671                                                                                                                         | 2,61E-03 |
| Kashin-Beck Disease                 | C05.116.099.708.534                                                                                                                     | 2,63E-03 |
| Tendinopathy                        | C05.651.869                                                                                                                             | 2,66E-03 |
| Placenta Accreta                    | C13.703.420.643, C13.703.590.609                                                                                                        | 2,72E-03 |
| Skin Diseases, Eczematous           | C17.800.815                                                                                                                             | 2,73E-03 |
| Aggressive Periodontitis            | C07.465.714.533.161                                                                                                                     | 2,77E-03 |
| Pyometra                            | C13.351.500.852.544                                                                                                                     | 2,81E-03 |
| Anaplasmatocae Infections           | C01.252.400.054                                                                                                                         | 2,84E-03 |
| Periapical Periodontitis            | C07.465.714.306.700, C07.465.714.533.487, C07.320.830.700                                                                               | 2,88E-03 |
| Vasculitis                          | C14.907.940                                                                                                                             | 2,90E-03 |
| Mononegavirales Infections          | C02.782.580                                                                                                                             | 2,94E-03 |
| Multiple Myeloma                    | C15.378.463.515.460, C14.907.454.460, C20.683.780.650, C15.378.147.780.650                                                              | 2,97E-03 |
| Trophoblastic Tumor, Placental Site | C04.850.908.416.186.875, C04.557.465.955.207.875, C04.557.465.955.416.202.875, C13.703.720.949.416.218.875, C04.557.470.200.025.455.875 | 3,00E-03 |
| Graves Ophthalmopathy               | C11.270.842, C20.111.555.500, C19.874.397.370.500, C19.874.283.605.500, C11.675.349.500.500                                             | 3,03E-03 |
| Obstetric Labor Complications       | C13.703.420                                                                                                                             | 3,06E-03 |
| Shwartzman Phenomenon               | C15.378.463.515.810, C14.907.454.810, C14.907.940.890                                                                                   | 3,09E-03 |
| Mandibular Diseases                 | C05.500.607                                                                                                                             | 3,11E-03 |
| Multiple Myeloma                    | C04.557.595.500, C20.683.515.845                                                                                                        | 3,12E-03 |
| HELLP Syndrome                      | C13.703.395.186                                                                                                                         | 3,14E-03 |
| Dermatomyositis                     | C17.800.185, C10.668.491.562.575.500, C17.300.250, C05.651.594.819.500, C05.651.594.297, C10.668.491.562.150                            | 3,18E-03 |
| Parapsoriasis                       | C17.800.859.575                                                                                                                         | 3,19E-03 |
| Neoplasms, Connective Tissue        | C04.557.450.565                                                                                                                         | 3,23E-03 |
| Orthomyxoviridae Infections         | C02.782.620                                                                                                                             | 3,23E-03 |
| Salivary Gland Diseases             | C07.465.815                                                                                                                             | 3,26E-03 |
| Secernentea Infections              | C03.335.508.700                                                                                                                         | 3,27E-03 |
| Fetal Diseases                      | C16.300                                                                                                                                 | 3,30E-03 |
| Paranasal Sinus Diseases            | C08.460.692, C09.603.692                                                                                                                | 3,31E-03 |
| Bile Duct Diseases                  | C06.130.120                                                                                                                             | 3,31E-03 |
| Neoplasms, Vascular Tissue          | C04.557.645                                                                                                                             | 3,32E-03 |
| Esophageal Diseases                 | C06.405.117                                                                                                                             | 3,32E-03 |
| Alveolitis, Extrinsic Allergic      | C08.381.483.125, C20.543.480.680.075, C08.674.055                                                                                       | 3,34E-03 |
| Graves Disease                      | C19.874.283.605, C19.874.397.370, C11.675.349.500, C20.111.555                                                                          | 3,41E-03 |

|                                             |                                                                                                      |          |
|---------------------------------------------|------------------------------------------------------------------------------------------------------|----------|
| Neoplasms by Site                           | C04.588                                                                                              | 3,48E-03 |
| Meningitis, Bacterial                       | C10.228.228.507.280, C01.252.200.500, C10.228.228.180.500                                            | 3,50E-03 |
| Fetal Diseases                              | C13.703.277                                                                                          | 3,53E-03 |
| Thrombosis                                  | C14.907.355.830                                                                                      | 3,54E-03 |
| Central Nervous System Viral Diseases       | C02.182, C10.228.228.210                                                                             | 3,55E-03 |
| Lacrimal Apparatus Diseases                 | C11.496                                                                                              | 3,55E-03 |
| Mandibular Diseases                         | C07.320.610                                                                                          | 3,56E-03 |
| Head and Neck Neoplasms                     | C04.588.443                                                                                          | 3,57E-03 |
| Fibrosis                                    | C23.550.355                                                                                          | 3,58E-03 |
| Angiolymphoid Hyperplasia with Eosinophilia | C17.800.060, C15.604.515.292.007, C15.378.553.231.085                                                | 3,59E-03 |
| Respiratory Syncytial Virus Infections      | C02.782.580.600.620.750                                                                              | 3,61E-03 |
| Pituitary Diseases                          | C19.700                                                                                              | 3,65E-03 |
| Pulmonary Emphysema                         | C08.381.495.389.750                                                                                  | 3,66E-03 |
| Spinal Cord Compression                     | C26.819.678, C10.228.854.761                                                                         | 3,72E-03 |
| Abscess                                     | C01.539.830.025                                                                                      | 3,74E-03 |
| Otitis Media                                | C09.218.705.663                                                                                      | 3,74E-03 |
| Helminthiasis                               | C03.335                                                                                              | 3,74E-03 |
| Osteolysis                                  | C05.116.264.579                                                                                      | 3,79E-03 |
| Testicular Hydrocele                        | C12.294.882                                                                                          | 3,80E-03 |
| Pneumovirus Infections                      | C02.782.580.600.620                                                                                  | 3,82E-03 |
| Granuloma                                   | C23.550.382                                                                                          | 3,84E-03 |
| Pain                                        | C23.888.646                                                                                          | 3,84E-03 |
| Arthritis, Psoriatic                        | C17.800.859.675.175, C05.550.114.865.800.424, C05.116.900.853.625.800.424, C05.550.114.145           | 3,85E-03 |
| Abortion, Habitual                          | C13.703.039.089                                                                                      | 3,85E-03 |
| Pneumonia, Pneumocystis                     | C08.730.610.675, C08.730.435.700, C01.703.770.700, C01.703.534.700, C08.381.472.700, C08.381.677.675 | 3,86E-03 |
| Blood Loss, Surgical                        | C23.550.505.300, C23.550.414.300                                                                     | 3,90E-03 |
| Polyradiculoneuropathy                      | C20.111.258.750, C10.314.750, C10.114.750                                                            | 3,93E-03 |
| Balantidiasis                               | C06.405.469.452.146, C03.752.200.146, C03.432.146                                                    | 3,95E-03 |
| Signs and Symptoms, Respiratory             | C23.888.852                                                                                          | 3,98E-03 |
| Influenza, Human                            | C02.782.620.365, C08.730.310                                                                         | 3,98E-03 |
| Pancreatitis, Chronic                       | C06.689.750.830                                                                                      | 3,99E-03 |
| Strongylida Infections                      | C03.335.508.700.775                                                                                  | 3,99E-03 |
| X-Linked Combined Immunodeficiency Diseases | C20.673.815.500, C16.614.815.500, C16.320.322.968                                                    | 4,02E-03 |
| Signs and Symptoms                          | C23.888                                                                                              | 4,03E-03 |
| Hypertension, Pregnancy-Induced             | C14.907.489.480                                                                                      | 4,04E-03 |
| Dog Diseases                                | C22.268                                                                                              | 4,09E-03 |
| Hypothalamic Diseases                       | C10.228.140.617                                                                                      | 4,11E-03 |
| Peritoneal Neoplasms                        | C04.588.274.780, C06.844.620, C06.301.780, C04.588.033.513                                           | 4,12E-03 |
| Arthritis, Experimental                     | C05.550.114.015                                                                                      | 4,12E-03 |
| Asymptomatic Infections                     | C23.550.291.187.500                                                                                  | 4,13E-03 |
| Muscular Dystrophy, Animal                  | C22.595                                                                                              | 4,13E-03 |
| Keratitis, Herpetic                         | C11.294.800.475, C02.256.466.382.465, C11.204.564.425, C02.325.465                                   | 4,22E-03 |
| Respiratory Insufficiency                   | C08.618.846                                                                                          | 4,25E-03 |
| Chagas Cardiomyopathy                       | C14.280.238.190, C03.752.300.900.200.190                                                             | 4,27E-03 |
| Gingival Overgrowth                         | C07.465.714.258.428                                                                                  | 4,27E-03 |
| Pneumonia                                   | C08.381.677, C08.730.610                                                                             | 4,29E-03 |
| Polyradiculoneuropathy                      | C10.668.829.800.750                                                                                  | 4,31E-03 |
| Bone Neoplasms                              | C04.588.149, C05.116.231                                                                             | 4,33E-03 |
| Tuberculosis, Pulmonary                     | C08.381.922, C08.730.939, C01.252.410.040.552.846.899                                                | 4,34E-03 |
| Synovitis                                   | C05.550.870                                                                                          | 4,40E-03 |
| Paramyxoviridae Infections                  | C02.782.580.600                                                                                      | 4,45E-03 |

|                                |                                                                                    |          |
|--------------------------------|------------------------------------------------------------------------------------|----------|
| Lupus Erythematosus, Cutaneous | C17.300.475, C17.800.480                                                           | 4,46E-03 |
| Pneumocystis Infections        | C01.703.770                                                                        | 4,46E-03 |
| Necrobiotic Disorders          | C17.800.550, C17.300.200.495                                                       | 4,47E-03 |
| Paraproteinemias               | C15.378.147.780                                                                    | 4,48E-03 |
| Exophthalmos                   | C11.675.349                                                                        | 4,49E-03 |
| Arteriosclerosis               | C14.907.137.126                                                                    | 4,52E-03 |
| Paraproteinemias               | C20.683.780                                                                        | 4,55E-03 |
| Stomatitis                     | C07.465.864                                                                        | 4,61E-03 |
| Down Syndrome                  | C16.131.260.260, C10.597.606.643.220, C16.131.077.327, C16.320.180.260             | 4,62E-03 |
| Lymphatic Metastasis           | C23.550.727.650.560, C04.697.650.560                                               | 4,62E-03 |
| Gastritis                      | C06.405.748.398, C06.405.205.697                                                   | 4,65E-03 |
| Neoplasms, Plasma Cell         | C04.557.595                                                                        | 4,66E-03 |
| Ovarian Diseases               | C19.391.630                                                                        | 4,67E-03 |
| Otitis                         | C09.218.705                                                                        | 4,67E-03 |
| Ovarian Diseases               | C13.351.500.056.630                                                                | 4,70E-03 |
| Bronchitis                     | C08.730.099                                                                        | 4,80E-03 |
| Dysentery, Bacillary           | C06.405.205.331.479, C06.405.469.300.479, C01.252.400.310.229                      | 4,81E-03 |
| Glomerulonephritis             | C13.351.968.419.570.363, C12.777.419.570.363                                       | 4,82E-03 |
| Skin Diseases, Vesiculobullous | C17.800.865                                                                        | 4,86E-03 |
| Behcet Syndrome                | C17.800.862.150, C07.465.075, C14.907.940.100, C11.941.879.780.880.200             | 4,86E-03 |
| Necrosis                       | C23.550.717                                                                        | 4,88E-03 |
| Systemic Vasculitis            | C14.907.940.897                                                                    | 4,90E-03 |
| Scrub Typhus                   | C01.252.400.780.850                                                                | 4,94E-03 |
| Pleural Effusion, Malignant    | C08.528.694.700, C04.588.894.797.640.700, C08.785.640.700, C08.528.652.700         | 4,96E-03 |
| Ulcer                          | C23.550.891                                                                        | 4,96E-03 |
| Skin Neoplasms                 | C17.800.882, C04.588.805                                                           | 4,97E-03 |
| Conjunctival Diseases          | C11.187                                                                            | 5,01E-03 |
| Epidermolysis Bullosa          | C17.800.865.410, C16.131.831.493, C17.800.804.493, C17.800.827.275                 | 5,02E-03 |
| Signs and Symptoms, Digestive  | C23.888.821                                                                        | 5,02E-03 |
| Adnexal Diseases               | C13.351.500.056                                                                    | 5,14E-03 |
| Meningitis                     | C10.228.228.507                                                                    | 5,15E-03 |
| Polyomavirus Infections        | C02.256.721                                                                        | 5,16E-03 |
| Cough                          | C08.618.248, C23.888.852.293                                                       | 5,17E-03 |
| Embolism and Thrombosis        | C14.907.355                                                                        | 5,25E-03 |
| Rhinitis, Allergic, Perennial  | C08.674.453.500, C20.543.480.680.443.500, C08.460.799.315.500, C09.603.799.315.500 | 5,26E-03 |
| Myositis                       | C10.668.491.562                                                                    | 5,30E-03 |
| Angina Pectoris                | C23.888.646.215.500                                                                | 5,38E-03 |
| Eye Infections, Bacterial      | C01.539.375.354, C01.252.354, C11.294.354                                          | 5,39E-03 |
| Hip Dislocation, Congenital    | C16.131.621.449, C05.660.449                                                       | 5,43E-03 |
| Arthralgia                     | C05.550.091, C23.888.646.130                                                       | 5,44E-03 |
| Cholestasis                    | C06.130.120.135                                                                    | 5,49E-03 |
| Cholestasis, Intrahepatic      | C06.130.120.135.250, C06.552.150                                                   | 5,51E-03 |
| Hematologic Neoplasms          | C04.588.448, C15.378.400                                                           | 5,68E-03 |
| Spondylarthropathies           | C05.116.900.853.625.800, C05.550.114.865.800                                       | 5,72E-03 |
| Angina Pectoris                | C14.280.647.187, C14.907.585.187                                                   | 5,80E-03 |
| Dermatitis, Seborrheic         | C17.800.794.230, C17.800.174.580, C17.800.859.350, C17.800.815.580                 | 5,81E-03 |
| Cicatrix, Hypertrophic         | C23.550.355.274.505                                                                | 5,95E-03 |
| Herpes Simplex                 | C02.256.466.382                                                                    | 6,02E-03 |
| Neoplasms, Neuroepithelial     | C04.557.470.670, C04.557.580.625.600, C04.557.465.625.600                          | 6,08E-03 |
| Occupational Diseases          | C24                                                                                | 6,10E-03 |

|                                             |                                                                                                                              |          |
|---------------------------------------------|------------------------------------------------------------------------------------------------------------------------------|----------|
| Asthma                                      | C08.381.495.108                                                                                                              | 6,10E-03 |
| Central Nervous System Bacterial Infections | C01.252.200                                                                                                                  | 6,16E-03 |
| Myositis                                    | C05.651.594                                                                                                                  | 6,19E-03 |
| Cranial Nerve Injuries                      | C26.260.237, C10.292.262, C26.915.300.400, C10.900.300.218                                                                   | 6,20E-03 |
| Tooth Injuries                              | C26.900, C07.793.850                                                                                                         | 6,21E-03 |
| Asthma                                      | C20.543.480.680.095                                                                                                          | 6,27E-03 |
| Atherosclerosis                             | C14.907.137.126.307                                                                                                          | 6,29E-03 |
| Central Nervous System Infections           | C10.228.228                                                                                                                  | 6,36E-03 |
| Sjogren's Syndrome                          | C07.465.815.929.669, C05.799.114.774, C05.550.114.154.774, C20.111.199.774, C11.496.260.719, C17.300.775.099.774             | 6,39E-03 |
| Central Nervous System Bacterial Infections | C10.228.228.180                                                                                                              | 6,43E-03 |
| Cryptogenic Organizing Pneumonia            | C08.381.483.487.249, C08.381.495.146.135.140.200, C08.127.446.135.140.200                                                    | 6,48E-03 |
| Periapical Diseases                         | C07.320.830, C07.465.714.306                                                                                                 | 6,49E-03 |
| Enteritis                                   | C06.405.469.326, C06.405.205.462                                                                                             | 6,51E-03 |
| Asthma                                      | C08.674.095, C08.127.108                                                                                                     | 6,55E-03 |
| Urogenital Neoplasms                        | C04.588.945                                                                                                                  | 6,55E-03 |
| Autoimmune Diseases                         | C20.111                                                                                                                      | 6,63E-03 |
| Chondrosarcoma                              | C04.557.450.565.280, C04.557.450.795.300                                                                                     | 6,70E-03 |
| Chest Pain                                  | C23.888.646.215                                                                                                              | 6,71E-03 |
| Lyme Neuroborreliosis                       | C01.252.400.825.480.700, C01.252.400.155.569.600, C10.228.228.180.437, C01.252.200.450, C01.252.847.193.569.600              | 6,75E-03 |
| Obstetric Labor, Premature                  | C13.703.420.491                                                                                                              | 6,83E-03 |
| Pneumonia, Pneumococcal                     | C08.381.677.540.550, C01.252.620.550, C01.252.410.890.670.750, C08.730.610.540.550                                           | 6,86E-03 |
| Male Urogenital Diseases                    | C12                                                                                                                          | 6,87E-03 |
| Arterial Occlusive Diseases                 | C14.907.137                                                                                                                  | 6,90E-03 |
| Conjunctivitis, Allergic                    | C11.187.183.200, C20.543.480.200                                                                                             | 6,99E-03 |
| Tick-Borne Diseases                         | C01.252.400.825                                                                                                              | 6,99E-03 |
| Sarcoma, Kaposi                             | C04.557.645.750, C04.557.450.795.850, C02.256.466.860                                                                        | 7,03E-03 |
| Mastocytosis                                | C04.557.450.565.465                                                                                                          | 7,03E-03 |
| Neurocysticercosis                          | C03.335.190.902.185.550, C03.105.250.550, C10.228.228.205.250.550                                                            | 7,03E-03 |
| Hernia                                      | C23.300.707                                                                                                                  | 7,04E-03 |
| Odontogenic Cysts                           | C07.320.450.670, C05.500.470.690, C04.182.089.530.690                                                                        | 7,05E-03 |
| Ovarian Neoplasms                           | C19.344.410, C04.588.322.455                                                                                                 | 7,05E-03 |
| Rhabditida Infections                       | C03.335.508.700.700                                                                                                          | 7,17E-03 |
| Strongyloidiasis                            | C03.335.508.700.700.799                                                                                                      | 7,17E-03 |
| Spondylitis, Ankylosing                     | C05.116.900.853.625.800.850, C05.550.069.680, C05.550.114.865.800.850                                                        | 7,20E-03 |
| Enterocolitis, Necrotizing                  | C06.405.205.596.700, C06.405.469.363.700                                                                                     | 7,24E-03 |
| Orbital Diseases                            | C11.675                                                                                                                      | 7,26E-03 |
| Pleural Diseases                            | C08.528                                                                                                                      | 7,28E-03 |
| Animal Diseases                             | C22                                                                                                                          | 7,35E-03 |
| Measles                                     | C02.782.580.600.500.500                                                                                                      | 7,44E-03 |
| Leukoencephalopathies                       | C10.228.140.695                                                                                                              | 7,45E-03 |
| Bovine Virus Diarrhea-Mucosal Disease       | C22.196.106, C02.782.350.675.106                                                                                             | 7,46E-03 |
| Environmental Illness                       | C21.223, C20.543.312                                                                                                         | 7,46E-03 |
| Pregnancy, Tubal                            | C13.703.733.703                                                                                                              | 7,46E-03 |
| Jaw Cysts                                   | C05.500.470, C04.182.089.530, C07.320.450                                                                                    | 7,58E-03 |
| Diabetic Angiopathies                       | C14.907.320, C19.246.099.500                                                                                                 | 7,59E-03 |
| Trachoma                                    | C01.539.375.354.220.800, C01.252.354.225.800, C11.294.354.220.800, C01.252.400.210.210.800, C11.187.183.220.889, C11.204.813 | 7,61E-03 |

|                                      |                                                                                                                                              |          |
|--------------------------------------|----------------------------------------------------------------------------------------------------------------------------------------------|----------|
| Lymphocytic Choriomeningitis         | C10.228.228.507.700.500, C02.587.580, C02.182.550.500, C10.228.228.210.500.500, C02.782.082.580                                              | 7,64E-03 |
| Pulmonary Eosinophilia               | C08.381.750, C15.378.553.231.549.750                                                                                                         | 7,71E-03 |
| Acute Pain                           | C10.597.617.088, C23.888.646.115                                                                                                             | 7,76E-03 |
| Sleep-Wake Transition Disorders      | C10.886.659.700                                                                                                                              | 7,88E-03 |
| Entropion                            | C11.338.443                                                                                                                                  | 7,88E-03 |
| Pouchitis                            | C06.405.469.420.520.500, C06.405.469.326.875.500, C06.405.205.462.624.500                                                                    | 7,91E-03 |
| Colic                                | C23.888.821.030.500, C23.888.646.100.600                                                                                                     | 7,91E-03 |
| Xerostomia                           | C07.465.815.929                                                                                                                              | 7,91E-03 |
| Diabetic Retinopathy                 | C14.907.320.382, C19.246.099.500.382, C11.768.257                                                                                            | 7,98E-03 |
| Heart Valve Diseases                 | C14.280.484                                                                                                                                  | 8,02E-03 |
| Ovarian Neoplasms                    | C13.351.937.418.685, C19.391.630.705, C13.351.500.056.630.705                                                                                | 8,04E-03 |
| Dyspnea                              | C08.618.326, C23.888.852.371                                                                                                                 | 8,12E-03 |
| Bronchiolitis Obliterans             | C08.127.446.135.140, C08.381.495.146.135.140                                                                                                 | 8,33E-03 |
| Hypertrophy                          | C23.300.775                                                                                                                                  | 8,37E-03 |
| Malaria, Cerebral                    | C03.105.300.500, C10.228.228.205.300.500, C03.752.530.620, C03.752.530.650.675                                                               | 8,48E-03 |
| Hookworm Infections                  | C03.335.508.700.775.455                                                                                                                      | 8,51E-03 |
| Abortion, Spontaneous                | C13.703.039                                                                                                                                  | 8,56E-03 |
| Blood Protein Disorders              | C15.378.147                                                                                                                                  | 8,61E-03 |
| Picornaviridae Infections            | C02.782.687                                                                                                                                  | 8,71E-03 |
| Muscular Dystrophy, Duchenne         | C16.320.577.300, C05.651.534.500.300, C10.668.491.175.500.300, C16.320.322.562                                                               | 8,72E-03 |
| Retinitis                            | C11.768.773                                                                                                                                  | 8,77E-03 |
| Opportunistic Infections             | C01.539.597, C02.597, C03.684                                                                                                                | 8,82E-03 |
| Dermatomycoses                       | C17.800.838.208, C01.539.800.200, C01.703.295                                                                                                | 8,82E-03 |
| Hernia, Abdominal                    | C23.300.707.374                                                                                                                              | 8,84E-03 |
| Carcinoma, Renal Cell                | C12.758.820.750.160, C12.777.419.473.160, C13.351.937.820.535.160, C04.557.470.200.025.390, C13.351.968.419.473.160, C04.588.945.947.535.160 | 8,85E-03 |
| Ankylosis                            | C05.550.069                                                                                                                                  | 8,86E-03 |
| Leukemia, Lymphoid                   | C04.557.337.428, C20.683.515.528, C15.604.515.560                                                                                            | 8,92E-03 |
| Bronchiolitis, Viral                 | C02.109, C08.127.446.135.321, C08.381.495.146.135.321, C08.730.099.135.321                                                                   | 8,98E-03 |
| Toxoplasmosis, Animal                | C03.701.688.817, C22.674.710.817, C03.752.625.817, C03.752.250.800.110                                                                       | 9,06E-03 |
| Thoracic Neoplasms                   | C04.588.894                                                                                                                                  | 9,23E-03 |
| Intellectual Disability              | C10.597.606.643                                                                                                                              | 9,26E-03 |
| Liver Cirrhosis                      | C06.552.630                                                                                                                                  | 9,28E-03 |
| RNA Virus Infections                 | C02.782                                                                                                                                      | 9,29E-03 |
| Superinfection                       | C03.684.880, C01.539.597.880, C02.597.880                                                                                                    | 9,30E-03 |
| Disorders of Environmental Origin    | C21                                                                                                                                          | 9,30E-03 |
| Prostatic Neoplasms                  | C04.588.945.440.770, C12.294.260.750, C12.294.565.625, C12.758.409.750                                                                       | 9,31E-03 |
| Pneumococcal Infections              | C01.252.410.890.670                                                                                                                          | 9,36E-03 |
| Neoplasms by Histologic Type         | C04.557                                                                                                                                      | 9,43E-03 |
| Eye Infections, Viral                | C11.294.800, C02.325                                                                                                                         | 9,44E-03 |
| Fractures, Bone                      | C26.404                                                                                                                                      | 9,46E-03 |
| Subacute Sclerosing Panencephalitis  | C10.228.228.210.150.300.600, C02.290.700, C10.228.228.245.340.700, C02.782.580.600.500.500.800, C02.182.500.300.600, C02.839.862             | 9,46E-03 |
| Central Nervous System Helminthiasis | C10.228.228.205.250, C03.105.250                                                                                                             | 9,46E-03 |
| Diabetes Mellitus                    | C19.246                                                                                                                                      | 9,50E-03 |
| Inflammatory Bowel Diseases          | C06.405.469.432, C06.405.205.731                                                                                                             | 9,56E-03 |
| Purpura                              | C15.378.100.802, C23.888.885.687, C23.550.414.950                                                                                            | 9,71E-03 |
| Respiratory Tract Neoplasms          | C08.785                                                                                                                                      | 9,80E-03 |
| Intervertebral Disc Displacement     | C23.300.707.952, C05.116.900.307                                                                                                             | 9,83E-03 |

|              |                                                                  |          |
|--------------|------------------------------------------------------------------|----------|
| Lyme Disease | C01.252.400.825.480, C01.252.400.155.569,<br>C01.252.847.193.569 | 9,91E-03 |
|--------------|------------------------------------------------------------------|----------|



**Key resources table**

| Reagent type (species) or resource | Designation                                                | Source or reference                                                                       | Identifiers                 | Additional information    |
|------------------------------------|------------------------------------------------------------|-------------------------------------------------------------------------------------------|-----------------------------|---------------------------|
| Antibody                           | Monoclonal mouse anti-TLR4                                 | Santa-Cruz Biotechnologies                                                                | Sc-293072, RRID:AB_10611320 | IF (1:400),<br>WB (1:400) |
| Antibody                           | Monoclonal mouse anti- $\beta$ Actin                       | ThermoFisher Scientific                                                                   | MA1-91399,                  | WB<br>(1:10000)           |
| Cell line                          | Human epithelial amnion cells AV3                          | ATCC                                                                                      | CCL-21, RRID:CVCL_1904      |                           |
| Cell line                          | Human epithelial amnion cells FL                           | ATCC                                                                                      | CCL-62, RRID:CVCL_1905      |                           |
| Cell line                          | Human epithelial amnion cells WISH                         | ATCC                                                                                      | CCL-25, RRID:CVCL_1909      |                           |
| Cell line                          | Human embryonic kidney (HEK) 293                           | ATCC                                                                                      | CRL-1573, RRID:CVCL_0045    |                           |
| Commercial assay or kit            | QIAamp <sup>®</sup> DNA Mini Kit                           | Qiagen                                                                                    | Cat #: 51306                |                           |
| Commercial assay or kit            | EZ DNA Methylation <sup>™</sup> Kit                        | Zymo research                                                                             | Cat #: D5005                |                           |
| Commercial assay or kit            | Bio-Plex Pro <sup>™</sup> Human Cytokine 27-plex Assay     | Bio-Rad                                                                                   | Cat #: M500KCAF0Y           |                           |
| Commercial assay or kit            | BCA Assay kit                                              | Pierce                                                                                    | Cat #: 23227                |                           |
| Commercial assay or kit            | RNeasy <sup>®</sup> Mini Kit                               | Qiagen                                                                                    | Cat #:74106                 |                           |
| Commercial assay or kit            | SuperScript <sup>™</sup> III First-Strand Synthesis System | Invitrogen                                                                                | Cat #: 18080051             |                           |
| Commercial assay or kit            | Dual-Luciferase <sup>®</sup> Reporter Assay System         | Promega                                                                                   | Cat #:E1910                 |                           |
| Commercial assay or kit            | Lipofectamine <sup>®</sup> 3000 Transfection Kit           | Invitrogen                                                                                | Cat #: L3000001             |                           |
| Software, algorithm                | GraphPad Prism Software                                    | GraphPad                                                                                  | RRID:SCR_002798             |                           |
| Software, algorithm                | GePS Genomatix                                             | Genomatix                                                                                 | RRID:SCR_008036             |                           |
| Software, algorithm                | Image Lab <sup>™</sup> software                            | Bio-Rad                                                                                   | RRID:SCR_014210             |                           |
| Software, algorithm                | miRWalk                                                    | <a href="http://mirwalk.umm.uni-heidelberg.de/">http://mirwalk.umm.uni-heidelberg.de/</a> | RRID:SCR_016509             |                           |
| Software, algorithm                | R (CRAN)                                                   | <a href="https://cran.r-project.org/">https://cran.r-project.org/</a>                     | RRID:SCR_003005             |                           |
| Software, algorithm                | Generic GO term finder                                     | <a href="http://go.princeton.edu">http://go.princeton.edu</a>                             | RRID:SCR_008870             |                           |
| Software, algorithm                | Bioconductor                                               | <a href="https://bioconductor.org/">https://bioconductor.org/</a>                         | RRID #:SCR_006442           |                           |
| Software, algorithm                | REVIGO                                                     | <a href="http://revigo.irb.hr/">http://revigo.irb.hr/</a>                                 | RRID:SCR_005825             |                           |
| Chemical compound, drug            | LPS from E.coli (O55:B5)                                   | Sigma-Aldrich Chimie                                                                      | L2880                       | 0,5 $\mu$ g/ml            |
| Recombinant DNA reagent            | pMIR-REPORT <sup>™</sup> luciferase vector                 | Ambion                                                                                    | Cat #: AM5795               |                           |
| Recombinant DNA reagent            | pCMV-MIR                                                   | OriGene Technologies                                                                      | Cat #: PCMVIR               |                           |
| Recombinant DNA reagent            | pCMV-pre-mir125b1                                          | OriGene Technologies                                                                      | Cat #: SC400083             |                           |
| Recombinant DNA reagent            | pCMV-pre-let7A2                                            | OriGene Technologies                                                                      | Generated in this paper     |                           |
| Recombinant DNA reagent            | pRL-TK Renilla luciferase plasmid                          | Promega                                                                                   | Cat #: E2241                |                           |
